# Supplementary material for: Impact of fertilization with reducing in nitrogen and phosphorous application on growth, yield and biomass accumulation of rice (Oryza sativa L.) under a dual cropping system
Source: PeerJ. 2021 Jul 7;9:e11668. doi: 10.7717/peerj.11668 (PMC8272461; doi:10.7717/peerj.11668)
Supplement: Supplemental Information 1 [file peerj-09-11668-s001.xlsx]

## Sheet: early season Binyang
一F1A			二F1A			三F1A			一F2A			二F2A			三F2A			一F3A			二F3A			三F3A			一F1B			二F1B			三F1B			一F2B			二F2B			三F2B			一F3B			二F3B
Length/cm	width/cm		Length/cm	width/cm		Length/cm	width/cm		Length/cm	width/cm		Length/cm	width/cm		Length/cm	width/cm		Length/cm	width/cm		Length/cm	width/cm		Length/cm	width/cm		Length/cm	width/cm		Length/cm	width/cm		Length/cm	width/cm		Length/cm	width/cm		Length/cm	width/cm		Length/cm	width/cm		Length/cm	width/cm		Length/cm	width/cm
49.6	1.4	52.08	30.4	1.6	36.48	35.9	1.1	29.6175	41	1	30.75	45	1	33.75	43.7	1	32.775	29.2	0.9	19.71	43.2	1.2	38.88	27.4	1.4	28.77	55.5	1.7	70.7625	56.2	1.6	67.44	46	2	69	32.3	2	48.45	34.9	2.3	60.2025	46.2	2	69.3	39.2	1.3	38.22	28	1.7
43.7	1.2	39.33	43.5	1.3	42.4125	27.5	1.3	26.8125	40	1.2	36	31.7	1.1	26.1525	32.5	1.1	26.8125	29.5	0.8	17.7	39.2	1.2	35.28	33.2	1.7	42.33	54.1	2	81.15	36.3	2.2	59.895	39.5	1.7	50.3625	42.7	1.5	48.0375	34	2.2	56.1	42.2	1.9	60.135	41.5	1.2	37.35	39.8	1.3
43.3	1.5	48.7125	30.1	1.6	36.12	37.9	1.5	42.6375	29.7	0.9	20.0475	44	1.2	39.6	41.5	1.2	37.35	30	1	22.5	42.1	1	31.575	42.3	1.1	34.8975	32.3	2	48.45	44	2.3	75.9	29.8	2	44.7	32.9	1.9	46.8825	58.2	2.1	91.665	43.4	1.5	48.825	38.5	1.4	40.425	43	1.5
31.4	1.7	40.035	25.7	1.5	28.9125	46	1.2	41.4	42.2	1.3	41.145	45	1.2	40.5	30.5	1.4	32.025	26.7	1.2	24.03	29.4	1	22.05	36.8	1.1	30.36	47.2	2.1	74.34	48	1.5	54	36.6	2.1	57.645	40.9	1.5	46.0125	46	1.5	51.75	44.5	1.4	46.725	40	2	60	55	1.4
36.8	1.2	33.12	44.8	1.3	43.68	34.5	0.9	23.2875	35.3	1.2	31.77	46	1.1	37.95	28.5	1.3	27.7875	30.3	0.7	15.9075	27.2	1.2	24.48	34.1	1.8	46.035	35.9	2.1	56.5425	55.5	1.7	70.7625	38.6	2.5	72.375	35.5	2	53.25	49.9	1.7	63.6225	45	1.6	54	37.3	2.2	61.545	49.1	1.5
35.1	1.5	39.4875	39.5	1	29.625	40.6	1.1	33.495	43.2	1	32.4	38.7	1	29.025	44.3	1.1	36.5475	26.1	0.8	15.66	40.6	1.1	33.495	32.1	1.2	28.89	39.5	1.4	41.475	30.4	2	45.6	41.7	2.1	65.6775	29.9	1.4	31.395	35.1	1.9	50.0175	39.8	1.8	53.73	44.2	1.4	46.41	29.9	1.8
37.5	1.9	53.4375	33.1	1	24.825	35.7	1.7	45.5175	35	1	26.25	34.6	1.2	31.14	22	1.3	21.45	31	0.9	20.925	37.2	1	27.9	28.5	1.6	34.2	28.9	2.1	45.5175	36.4	2.2	60.06	50	1.4	52.5	33.5	1.9	47.7375	43.5	2.1	68.5125	46.4	1.6	55.68	48.5	1.4	50.925	37	1.3
52.3	1.3	50.9925	43.5	1.2	39.15	36	1.5	40.5	36.8	1.2	33.12	47.4	1	35.55	42.1	1.2	37.89	32	1.2	28.8	45	1	33.75	44.2	0.9	29.835	58.1	1.6	69.72	51.2	1.4	53.76	41.5	2.1	65.3625	49.8	1.2	44.82	44.5	2.3	76.7625	39.2	2	58.8	39.3	1.4	41.265	31.6	1.8
50.5	1.4	53.025	48.5	1.2	43.65	29.1	1.4	30.555	48.2	1.2	43.38	33.7	1.5	37.9125	30.5	1.2	27.45	37.9	0.9	25.5825	29.5	1.2	26.55	24.7	1.3	24.0825	38.1	2.2	62.865	53.9	1.7	68.7225	32.2	2.3	55.545	47.8	1.6	57.36	41.9	2.1	65.9925	39.6	2.2	65.34	39.5	1.4	41.475	35.9	1.7
30.8	1.4	32.34	37.5	1.1	30.9375	40.5	1	30.375	39.5	1	29.625	46.5	1.3	45.3375	46	1.2	41.4	24	1.2	21.6	35.8	1.2	32.22	23.1	1.3	22.5225	53.2	2.2	87.78	42.8	1.7	54.57	23.7	1.9	33.7725	41.3	1.7	52.6575	38.5	1.7	49.0875	27.7	2	41.55	38.8	1.4	40.74	37.6	1.3
34	1.2	30.6	24	1.5	27	38.5	1.4	40.425	43.2	1	32.4	42.3	1.2	38.07	27.8	1.3	27.105	24.9	1	18.675	34	0.9	22.95	37.3	1	27.975	53.2	1.8	71.82	38	1.6	45.6	30.2	1.9	43.035	44.9	1.7	57.2475	53.7	1.7	68.4675	40.8	1.6	48.96	33.6	1.2	30.24	28.8	1.7
41	1.3	39.975	34.2	1.7	43.605	36.7	1.1	30.2775	47.9	1	35.925	46.7	1.1	38.5275	45.6	1.2	41.04	33.7	1.2	30.33	35.7	1.1	29.4525	39.6	1	29.7	32.5	2.1	51.1875	50.2	1.9	71.535	32.6	2.3	56.235	30.3	2.1	47.7225	38.6	2.4	69.48	28.5	1.9	40.6125	34.8	1.3	33.93	44.7	1.3
32	1.4	33.6	40	1	30	47	1.3	45.825	41.1	1.5	46.2375	42.5	1.2	38.25	38.8	1.1	32.01	27.4	1.5	30.825	39.3	1	29.475	39.6	1.2	35.64	50.7	1.9	72.2475	49	2.3	84.525	26.7	1.8	36.045	31	1.6	37.2	32	2	48	35.1	1.8	47.385	31.9	1.9	45.4575	42.7	1.9
44.8	1.2	40.32	28.3	1.1	23.3475	32.2	1.4	33.81	42.2	1.1	34.815	43.2	1.1	35.64	34.6	1	25.95	25.6	1.4	26.88	27.8	1	20.85	33.5	1	25.125	31.9	2.2	52.635	38.6	2	57.9	38.5	2.3	66.4125	37.2	1.7	47.43	37	2.1	58.275	30.8	2	46.2	31	2	46.5	37.7	1
47.3	1	35.475	37.2	1.2	33.48	27	1.2	24.3	34.1	1.5	38.3625	43.3	1.2	38.97	25.7	1.1	21.2025	23.6	1.3	23.01	33.8	0.9	22.815	39.4	1.2	35.46	51.9	1.8	70.065	49.7	1.8	67.095	42.2	2	63.3	48	1.6	57.6	53.6	1.9	76.38	50.6	1.9	72.105	31.5	2	47.25	31.9	1.6
51.9	1.4	54.495	43.5	1.2	39.15	42.4	1.1	34.98	45.7	1.1	37.7025	31.5	1.2	28.35	42.5	1.2	38.25	26.7	1.4	28.035	44.2	1.1	36.465	34.2	1.1	28.215	42.8	2.1	67.41	51.3	1.4	53.865	42.9	2.3	74.0025	49.6	1.4	52.08	48	1.6	57.6	27.7	1.9	39.4725	26	1.9	37.05	41.2	1.2
35.6	1.1	29.37	43.2	1.1	35.64	32	1.4	33.6	36.7	1.2	33.03	45.6	1.2	41.04	41.6	1.1	34.32	31.8	0.9	21.465	36.8	1	27.6	34.3	1.3	33.4425	53.5	1.5	60.1875	46	1.6	55.2	31.6	1.9	45.03	29.8	1.8	40.23	53.6	1.7	68.34	49	1.5	55.125	37.4	1.3	36.465	40.5	2
49.2	1.2	44.28	44	1.1	36.3	40.5	1	30.375	39.2	0.8	23.52	37.5	1	28.125	44.4	1.2	39.96	30.7	1.1	25.3275	29.4	1	22.05	41.1	1	30.825	28.2	2	42.3	40.2	2	60.3	33.1	1.8	44.685	34.8	2	52.2	33.9	2	50.85	31.1	2	46.65	40	1.4	42	53.2	1.3
54.7	1.4	57.435	39.6	1	29.7	24	1.4	25.2	40.7	0.9	27.4725	43.1	1.1	35.5575	30.2	1.6	36.24	25.7	0.9	17.3475	35.6	0.9	24.03	25.3	1.5	28.4625	48.7	1.8	65.745	31.8	2.1	50.085	39.8	1.7	50.745	28.4	1.8	38.34	40.5	2.1	63.7875	28.5	1.9	40.6125	39.2	1.7	49.98	30.7	1.3
37.3	1.3	36.3675	43	1.2	38.7	41.6	1.3	40.56	33.7	1	25.275	36.8	1.1	30.36	30.5	1.5	34.3125	24.1	1.5	27.1125	33.6	1.1	27.72	38	1	28.5	46.8	2.3	80.73	40	2.3	69	44.5	1.6	53.4	45.6	1.2	41.04	48.4	2.1	76.23	49.6	1.6	59.52	43.1	1.4	45.255	40	1.3
		844.477			692.715			683.55			659.227			709.808			651.878			461.423			569.587			625.268			1272.93			1225.82			1099.83			947.692			1271.12			1050.73			872.482
	Total leaf area (cm 2)	Total leaf area（m²）	Leaf samples(g)	Total leaf weight（g）	Specific leaf weight（g/m²）	Leaf area of 5 stumps（m²）	Leaf area of 1 stumps（m²）	（LAI）
一F1A	844.477	0.0844478	2.86	29.15	33.8671	0.860717	0.172143	4.09865
二F1A	692.715	0.0692715	2.6	21.5	37.5335	0.572822	0.114564	2.72772
三F1A	683.55	0.068355	2.91	19.39	42.5719	0.455465	0.091093	2.16888
一F2A	659.227	0.0659228	3.04	27.85	46.1146	0.60393	0.120786	2.87586
二F2A	709.808	0.0709807	3.01	30.44	42.4059	0.717825	0.143565	3.41822
三F2A	651.878	0.0651878	2.6	15.31	39.8848	0.383856	0.0767711	1.82788
一F3A	461.423	0.0461423	2.06	16.25	44.6446	0.363986	0.0727972	1.73327
二F3A	569.587	0.0569588	2.63	21.51	46.1738	0.465849	0.0931698	2.21833
三F3A	625.268	0.0625268	2.42	24.37	38.7034	0.62966	0.125932	2.99838
一F1B	1272.93	0.127293	4.19	22.77	32.9162	0.691757	0.138351	3.29408
二F1B	1225.82	0.122581	5.03	22.84	41.0339	0.556613	0.111323	2.65054
三F1B	1099.83	0.109983	4.43	17.17	40.279	0.426277	0.0852554	2.02989
一F2B	947.692	0.0947692	4.19	29.25	44.2127	0.661575	0.132315	3.15036
二F2B	1271.12	0.127112	4.21	26.24	33.1203	0.792263	0.158453	3.77268
三F2B	1050.73	0.105073	4.74	18.24	45.1116	0.404331	0.0808661	1.92538
一F3B	872.482	0.0872482	3.9	19.04	44.7	0.42595	0.0851901	2.02834
二F3B	863.737	0.0863737	3.75	20.47	43.416	0.471486	0.0942971	2.24517
三F3B	1111.45	0.111145	4.59	21.36	41.2972	0.517226	0.103445	2.46298
一F1C	1040.08	0.104008	4.31	29.98	41.4392	0.723469	0.144694	3.44509
二F1C	940.117	0.0940118	4.55	28.55	48.3982	0.589898	0.11798	2.80904
三F1C	898.117	0.0898117	3.88	18.24	43.2015	0.422208	0.0844416	2.01051
一F2C	856.658	0.0856657	3.81	22.82	44.4752	0.513095	0.102619	2.44331
二F2C	787.365	0.0787365	4.36	29.66	55.3746	0.535625	0.107125	2.55059
三F2C	883.087	0.0883088	4.15	22.45	46.9942	0.477718	0.0955437	2.27485
一F3C	587.543	0.0587543	2.99	17.55	50.8899	0.344862	0.0689724	1.6422
二F3C	792.795	0.0792795	3.52	21.73	44.3999	0.489416	0.0978832	2.33055
三F3C	840.668	0.0840667	3.96	23.7	47.1054	0.503127	0.100625	2.39584
一F1D	1011.15	0.101115	4.9	41.24	48.4597	0.851017	0.170203	4.05246
二F1D	1046.81	0.104681	5.05	37.72	48.2417	0.781896	0.156379	3.72332
三F1D	1095.14	0.109514	5.56	40.13	50.7696	0.790433	0.158087	3.76397
一F2D	858.202	0.0858203	4.78	37.91	55.6978	0.680637	0.136127	3.24113
二F2D	973.83	0.097383	5.12	38.32	52.5759	0.728851	0.14577	3.47072
三F2D	1089.53	0.108952	5.51	36.47	50.5725	0.721143	0.144229	3.43401
一F3D	802.913	0.0802912	4.65	31.12	57.9142	0.537347	0.107469	2.5588
二F3D	792.607	0.0792608	4.49	31.18	56.6485	0.550412	0.110082	2.62101
三F3D	895.643	0.0895642	4.39	34.22	49.0151	0.698152	0.13963	3.32453
[truncated: 58 more columns]

## Sheet: early season Beiliu
一F1A			二F1A			三F1A			一F2A			二F2A			三F2A			一F3A			二F3A			三F3A			一F1B			二F1B			三F1B			一F2B			二F2B			三F2B			一F3B			二F3B
Length/cm	width/cm		Length/cm	width/cm		Length/cm	width/cm		Length/cm	width/cm		Length/cm	width/cm		Length/cm	width/cm		Length/cm	width/cm		Length/cm	width/cm		Length/cm	width/cm		Length/cm	width/cm		Length/cm	width/cm		Length/cm	width/cm		Length/cm	width/cm		Length/cm	width/cm		Length/cm	width/cm		Length/cm	width/cm		Length/cm	width/cm
36.4	1.2	32.76	34.6	1.7	44.115	33.8	1.1	27.885	30.5	1.5	34.3125	32.4	1.2	29.16	38.2	1.6	45.84	24.7	0.9	16.6725	37.6	1	28.2	30.3	1.5	34.0875	32.1	2	48.15	33.5	2.1	52.7625	45.3	1.4	47.565	40.6	1.6	48.72	39.6	1.5	44.55	27.2	1.6	32.64	42.7	1.7	54.4425	36.3	1.2
28.8	1.2	25.92	30.3	1.8	40.905	33.4	1.2	30.06	35.6	1.6	42.72	27.4	1.1	22.605	49.4	1.4	51.87	29.7	0.9	20.0475	26.9	1.3	26.2275	24.5	1.1	20.2125	37.5	2.1	59.0625	29.5	2.5	55.3125	36.8	1.2	33.12	35	1.8	47.25	47.6	1.7	60.69	28	2.1	44.1	30.3	1.7	38.6325	39.7	1.4
28.2	1.3	27.495	41	1.4	43.05	29.8	1.5	33.525	44.6	1.2	40.14	31.2	1	23.4	42	1.4	44.1	25.2	1	18.9	34.8	1.1	28.71	38.6	1.7	49.215	40.9	1.7	52.1475	45	1.6	54	47.5	1.5	53.4375	31	2.2	51.15	42	1.5	47.25	25.6	2.1	40.32	46.7	1.5	52.5375	40	1.4
28.8	1.7	36.72	39.4	1	29.55	33.4	1.2	30.06	29.4	1.3	28.665	32.8	1.2	29.52	27.8	1.3	27.105	29.4	1.1	24.255	36.3	1.1	29.9475	36.2	1.6	43.44	53.8	2	80.7	29.9	2.3	51.5775	30.1	1.9	42.8925	52.3	1.5	58.8375	43.7	1.5	49.1625	37.5	1.1	30.9375	50.9	1.4	53.445	25.5	1.2
34.2	1.5	38.475	41.8	1.3	40.755	36.8	1.3	35.88	36	1.1	29.7	38	1.3	37.05	26.5	1.5	29.8125	31.8	0.9	21.465	25.2	1.2	22.68	34	1.7	43.35	38	2.5	71.25	37.8	2.4	68.04	37.9	1.8	51.165	41	1.7	52.275	29.8	1.5	33.525	27.7	1.9	39.4725	43	1.3	41.925	40.6	1.7
26.1	1.6	31.32	32.9	1.5	37.0125	27	1.4	28.35	36.3	1.3	35.3925	37.8	1.2	34.02	35.2	1.5	39.6	26.1	0.9	17.6175	35.3	1.2	31.77	41	1.2	36.9	47.8	2	71.7	36	2.7	72.9	43.1	1.6	51.72	43.9	1.6	52.68	33.5	1.4	35.175	28	2.2	46.2	29.7	1.9	42.3225	40	2.2
39.2	1.1	32.34	41	1.7	52.275	32.5	1.3	31.6875	20	1.4	21	33.8	1.2	30.42	33.2	1.3	32.37	32.7	1	24.525	30.1	1	22.575	34	1.3	33.15	47	1.9	66.975	35.5	2.3	61.2375	51.5	1.7	65.6625	27.7	2	41.55	37.8	1.5	42.525	40.5	1.9	57.7125	24	1.7	30.6	41.5	1.5
29.5	1.6	35.4	37	1.2	33.3	42.2	1	31.65	34.9	1.3	34.0275	35.4	1.1	29.205	28.4	1	21.3	27.1	0.9	18.2925	29.7	1.2	26.73	29.6	1.1	24.42	38	2.6	74.1	41.2	1.7	52.53	33.1	1.1	27.3075	48	1.6	57.6	44.5	1.4	46.725	28.5	2	42.75	33.4	1.8	45.09	34.8	1.3
29.4	1.4	30.87	35.5	1.8	47.925	27.2	1.4	28.56	31.2	1.3	30.42	25.9	1.4	27.195	35	1.7	44.625	27.9	0.9	18.8325	28.9	1.4	30.345	25.2	1.5	28.35	53.4	1.9	76.095	49	1.8	66.15	41.4	1.3	40.365	44	1.6	52.8	30	2	45	30.5	2.5	57.1875	35.6	1.6	42.72	40.3	1.2
33.4	1.6	40.08	47	1.3	45.825	31.7	1.1	26.1525	37.2	1.5	41.85	33.9	1.1	27.9675	43.8	1.3	42.705	24.7	1.1	20.3775	26.9	1.1	22.1925	29.9	1.7	38.1225	34.5	2.5	64.6875	33	2.1	51.975	41.1	1.6	49.32	39.1	1.9	55.7175	44.5	1.3	43.3875	33	2	49.5	34.5	1.5	38.8125	28.5	1.5
38.9	1.3	37.9275	35.2	1.4	36.96	34	1.7	43.35	27.2	1.7	34.68	36.6	1.1	30.195	34.1	1.3	33.2475	22.9	1.2	20.61	37.6	1.1	31.02	30.5	0.9	20.5875	43	1.8	58.05	44.5	2.2	73.425	49.3	1.5	55.4625	42.8	1.7	54.57	42.1	1.5	47.3625	30	2.1	47.25	44.8	1.5	50.4	39.5	1.5
31.3	1.2	28.17	36	1.3	35.1	29	1.3	28.275	40	1	30	43.5	1.2	39.15	35.7	1.7	45.5175	27.5	0.9	18.5625	24.7	1.3	24.0825	28.4	1	21.3	47.5	2	71.25	48.8	1.7	62.22	37.4	1.4	39.27	49	1.7	62.475	41.5	1.7	52.9125	39.5	1.7	50.3625	25.9	1.6	31.08	44.1	1.2
33.5	1.6	40.2	30.2	1.7	38.505	25.5	1.4	26.775	33.2	1.6	39.84	38.7	1.2	34.83	31	1.2	27.9	24	0.9	16.2	37.3	1	27.975	38.7	1.1	31.9275	37.2	2.3	64.17	39.5	2.4	71.1	39.5	1.7	50.3625	35.6	1.6	42.72	45	1.5	50.625	46.5	1.8	62.775	40.8	1.5	45.9	45.2	1.5
29.8	1.7	37.995	34.2	1.1	28.215	39.4	1.2	35.46	35.5	1.5	39.9375	31.9	1	23.925	31.1	1.6	37.32	28.6	0.9	19.305	34.4	1.1	28.38	19.7	1.3	19.2075	33.2	2.1	52.29	36.6	2.5	68.625	34.2	1.6	41.04	47.4	1.7	60.435	33.5	1.5	37.6875	44.5	1.6	53.4	36.5	1.4	38.325	40	1
27.4	1.7	34.935	36.5	1.4	38.325	25.5	1.4	26.775	36.8	1.6	44.16	22.5	1.1	18.5625	34.3	1.3	33.4425	28	1	21	30.2	1.5	33.975	26.6	1.1	21.945	30.5	2.2	50.325	38	2.6	74.1	49	1.5	55.125	41.8	1.5	47.025	26	1.8	35.1	39	1.9	55.575	26	1.6	31.2	28	1.7
27.8	1.3	27.105	31.2	1.5	35.1	28	1.4	29.4	34.6	1.7	44.115	27.5	1.3	26.8125	39.6	1.3	38.61	26	0.9	17.55	34.6	1	25.95	40.2	1	30.15	48	1.8	64.8	40.8	2.3	70.38	38.6	2	57.9	31.5	2.2	51.975	33.4	2	50.1	36.4	1.7	46.41	39.4	1.4	41.37	38.2	1.9
32.6	1.4	34.23	32.5	1.7	41.4375	37.5	1.3	36.5625	32.7	1.5	36.7875	28.1	1.3	27.3975	29.5	1.5	33.1875	31.6	1	23.7	22.5	1.2	20.25	34.4	1.5	38.7	43	2.2	70.95	40.7	2.4	73.26	47.1	1.5	52.9875	45.8	1.3	44.655	30.5	1.8	41.175	28.8	2.1	45.36	34.4	1.5	38.7	44.1	2
29.4	1.6	35.28	39.8	1.5	44.775	30.4	1.4	31.92	39	1.1	32.175	36.7	1.1	30.2775	40.2	1.4	42.21	31.5	1.1	25.9875	29.2	1	21.9	36.6	1.3	35.685	28.5	2.1	44.8875	41.4	2.7	83.835	44.5	1.6	53.4	52.2	1.4	54.81	37.8	2	56.7	37.5	1.6	45	26	1.6	31.2	38.5	1.8
21.8	1.5	24.525	38	1.4	39.9	37.5	1.1	30.9375	33.8	1.2	30.42	33.5	1.4	35.175	46.5	1.2	41.85	21	0.8	12.6	34.1	1.2	30.69	34.7	1.1	28.6275	50.8	1.9	72.39	29.9	1.7	38.1225	26.5	1.9	37.7625	38.7	1.6	46.44	40.2	1.6	48.24	34.8	1.7	44.37	32.4	1.6	38.88	39.6	1.5
36	1.5	40.5	24.7	1.6	29.64	27.2	1.2	24.48	38.5	1.3	37.5375	33.6	1.1	27.72	31.3	1.2	28.17	24	1	18	22.4	1	16.8	35	1	26.25	35.4	2.5	66.375	45.8	1.8	61.83	29.7	1.8	40.095	33.2	2.1	52.29	25.9	1.8	34.965	33	1.8	44.55	49.1	1.5	55.2375	22.5	1.5
		672.247			782.67			617.745			707.88			584.587			740.783			394.5			530.4			625.628			1280.36			1263.38			945.96			1035.97			902.857			935.872			842.82
	Total leaf area (cm 2)	Total leaf area（m²）	Leaf samples(g)	Total leaf weight（g）	Specific leaf weight（g/m²）	Leaf area of 5 stumps（m²）	Leaf area of 1 stumps（m²）	（LAI）
一F1A	672.247	0.0672247	3.08	20.85	45.8165	0.455077	0.0910153	1.98645
二F1A	782.67	0.078267	3.53	31.38	45.102	0.695756	0.139151	3.03703
三F1A	617.745	0.0617745	2.71	20.88	43.8692	0.47596	0.095192	2.0776
一F2A	707.88	0.070788	3.67	28.22	51.8449	0.544315	0.108863	2.37598
二F2A	584.587	0.0584587	2.87	19.8	49.0944	0.403304	0.0806609	1.76046
三F2A	740.783	0.0740782	3.63	15.43	49.0022	0.314884	0.0629767	1.37449
一F3A	394.5	0.03945	2.08	10.44	52.725	0.198009	0.0396017	0.864323
二F3A	530.4	0.05304	2.8	18.09	52.7903	0.342676	0.0685353	1.49581
三F3A	625.628	0.0625628	3.13	16.38	50.0298	0.327405	0.065481	1.42915
一F1B	1280.36	0.128035	5.38	30.09	42.0196	0.716094	0.143219	3.40997
二F1B	1263.38	0.126338	5.53	20.2	43.7714	0.461489	0.0922977	2.01443
三F1B	945.96	0.094596	4.25	21.9	44.9279	0.487448	0.0974895	2.12775
一F2B	1035.97	0.103597	5.15	23.41	49.7116	0.470916	0.0941832	2.05559
二F2B	902.857	0.0902857	3.98	17.57	44.0823	0.398573	0.0797146	1.7398
三F2B	935.872	0.0935872	3.73	15.2	39.8559	0.381374	0.0762749	1.81607
一F3B	842.82	0.084282	4.53	17.62	53.7481	0.327825	0.0655651	1.43098
二F3B	849.12	0.084912	4.42	22.78	52.0539	0.437623	0.0875247	1.91026
三F3B	941.227	0.0941228	4.18	14.33	44.4101	0.322674	0.0645349	1.4085
一F1C	996.668	0.0996667	4.92	26.47	49.3645	0.536215	0.107243	2.34062
二F1C	1011.56	0.101156	4.43	30.59	43.7936	0.698503	0.139701	3.04902
三F1C	899.28	0.089928	5	22.99	55.6	0.413489	0.0826978	1.80491
一F2C	813.84	0.081384	4.35	16.81	53.4503	0.314498	0.0628995	1.37281
二F2C	749.977	0.0749978	4.04	19.63	53.8683	0.364407	0.0728815	1.59067
三F2C	983.115	0.0983115	5.23	39.62	53.1983	0.744761	0.148952	3.54648
一F3C	842.587	0.0842587	4.17	25.76	49.4904	0.520505	0.104101	2.27205
二F3C	627.683	0.0627682	3.62	22.33	57.6725	0.387186	0.0774373	1.6901
三F3C	744.683	0.0744682	3.72	22.12	49.9542	0.442806	0.0885612	1.93288
一F1D	1123.28	0.112327	5.03	42.56	44.7798	0.950429	0.190086	4.1487
二F1D	951.375	0.0951375	3.97	35.92	41.7291	0.860791	0.172158	3.75742
三F1D	1080.56	0.108055	5.89	36.53	54.509	0.670164	0.134033	2.92532
一F2D	887.01	0.088701	4.14	28.92	46.6737	0.619621	0.123924	2.7047
二F2D	934.44	0.093444	4.48	40.18	47.9432	0.838076	0.167615	3.65827
三F2D	1022.47	0.102247	5.46	38.04	53.4002	0.712356	0.142471	3.39217
一F3D	816.54	0.081654	4.5	44.89	55.1106	0.814544	0.162909	3.55555
二F3D	802.935	0.0802935	3.9	21.37	48.5718	0.439967	0.0879934	1.92049
三F3D	765.135	0.0765135	4	22.81	52.2784	0.436318	0.0872636	1.90456
[truncated: 58 more columns]

## Sheet: early season Liucheng
一F1A			二F1A			三F1A			一F2A			二F2A			三F2A			一F3A			二F3A			三F3A			一F1B			二F1B			三F1B			一F2B			二F2B			三F2B			一F3B			二F3B
Length/cm	width/cm		Length/cm	width/cm		Length/cm	width/cm		Length/cm	width/cm		Length/cm	width/cm		Length/cm	width/cm		Length/cm	width/cm		Length/cm	width/cm		Length/cm	width/cm		Length/cm	width/cm		Length/cm	width/cm		Length/cm	width/cm		Length/cm	width/cm		Length/cm	width/cm		Length/cm	width/cm		Length/cm	width/cm		Length/cm	width/cm
38.8	1.5	43.65	26.2	1.5	29.475	41.2	1.8	55.62	31.2	1.3	30.42	34.9	1.7	44.4975	57	1.2	51.3	41	0.8	24.6	31.3	1.5	35.2125	34	1.5	38.25	35	1.7	44.625	28.5	1.6	34.2	43	2.1	67.725	37	1.9	52.725	34.5	2	51.75	35	1.7	44.625	29.2	1.8	39.42	23.2	1.9
40.7	1.9	57.9975	26.5	1.1	21.8625	55.2	1.7	70.38	30.5	1.3	29.7375	32.3	1.7	41.1825	44.2	1.1	36.465	27.5	1.3	26.8125	33.3	1	24.975	36	1.7	45.9	29	2	43.5	35	2.1	55.125	47.2	2.2	77.88	34.6	2.1	54.495	64.8	1.8	87.48	53	1.6	63.6	42.8	1.3	41.73	45.5	1.4
45.8	1.2	41.22	41.9	1.1	34.5675	59.2	1.2	53.28	29.3	1.5	32.9625	52.5	1.1	43.3125	43.6	1.2	39.24	25.5	1.3	24.8625	45.5	1.1	37.5375	34.2	1.6	41.04	35	2.3	60.375	58	1.8	78.3	44.3	1.7	56.4825	39.2	2	58.8	53	1.6	63.6	55	1.5	61.875	41.3	1.4	43.365	40.9	1.4
41	1.5	46.125	23.9	1.5	26.8875	49.7	1.4	52.185	28.2	1.3	27.495	36.1	1.8	48.735	29.2	1.5	32.85	25.6	1.5	28.8	28.8	1.3	28.08	37	1.5	41.625	50	1.8	67.5	44.5	2.5	83.4375	24	2.2	39.6	44	1.9	62.7	50.9	1.6	61.08	46	1.4	48.3	33.5	1.9	47.7375	38.9	1.3
33.6	1.6	40.32	33.5	1.5	37.6875	35.1	1.7	44.7525	38.8	1.5	43.65	48.1	1.1	39.6825	44.4	1.2	39.96	29	1.4	30.45	39	0.9	26.325	37.2	1.6	44.64	42.4	2	63.6	39.1	2.5	73.3125	44.7	2.2	73.755	51.1	2.2	84.315	34.1	2	51.15	48	1.8	64.8	26.8	1.8	36.18	28.1	1.8
36.6	1.7	46.665	35	1.2	31.5	33.4	1.8	45.09	32	1.1	26.4	44.4	1.1	36.63	27.3	1.3	26.6175	23.5	1.5	26.4375	39	1.2	35.1	27.3	1.9	38.9025	41	1.6	49.2	57.2	1.5	64.35	53	1.6	63.6	33.7	1.9	48.0225	44.8	2	67.2	41.5	2	62.25	41.6	1.5	46.8	24.7	1.8
53.6	1.2	48.24	29.6	1.2	26.64	41.5	1.5	46.6875	23	1.5	25.875	53.5	1.2	48.15	34.5	1.6	41.4	24.9	1.2	22.41	40.6	1	30.45	41.4	1	31.05	28	1.8	37.8	33.2	2.5	62.25	35.5	2.1	55.9125	35.7	2.1	56.2275	47.1	1.6	56.52	49	1.5	55.125	37.3	1.1	30.7725	37.1	1.4
35	1.6	42	24.8	1.1	20.46	28.6	1.8	38.61	34	1.4	35.7	53.5	1.2	48.15	39.9	1.2	35.91	27	1.3	26.325	38.1	1.1	31.4325	40.5	1.5	45.5625	52.5	1.6	63	59	1.7	75.225	28.1	2	42.15	36.6	2.1	57.645	47.5	2.5	89.0625	36.6	2	54.9	31.9	1.8	43.065	48.1	1.5
42.7	1.1	35.2275	28	1.4	29.4	35.5	1.5	39.9375	36.3	1	27.225	32	1.6	38.4	36	1.4	37.8	40.6	1	30.45	30.5	1.2	27.45	43.5	1.1	35.8875	31.7	2.4	57.06	37	2.1	58.275	44.9	1.4	47.145	36	2	54	43.3	1.8	58.455	43.5	2.1	68.5125	28.6	1.6	34.32	43.5	11
50.2	1.6	60.24	28.9	1.5	32.5125	60.5	1.4	63.525	42	1.1	34.65	35.9	1.6	43.08	48.5	1.3	47.2875	43.3	1	32.475	40.6	1.1	33.495	35	1.1	28.875	31.2	2.3	53.82	42.9	2.3	74.0025	46.5	1.8	62.775	46	1.5	51.75	37.8	2.2	62.37	44	1.9	62.7	33.3	1.5	37.4625	36.1	1.4
45.1	1.5	50.7375	44.5	1	33.375	57	1	42.75	26.6	1.3	25.935	35.2	1.7	44.88	53.3	1.1	43.9725	30.8	1.1	25.41	33.2	1.3	32.37	39	1.1	32.175	32	2.2	52.8	56.8	1.5	63.9	50	1.2	45	38	2	57	54	1.7	68.85	40.7	1.5	45.7875	24	1.7	30.6	27.2	1.7
29.9	1.7	38.1225	29.6	1	22.2	40.2	1.8	54.27	27.7	1.6	33.24	26.1	1.7	33.2775	59	1.3	57.525	27.8	1.4	29.19	46.1	1.2	41.49	46	1.1	37.95	46.5	1.9	66.2625	37.6	1.8	50.76	52.5	1.4	55.125	41.7	1.4	43.785	37	1.9	52.725	29.2	2	43.8	43.1	1.2	38.79	34.8	1.4
29	1.6	34.8	29	1.4	30.45	54.5	1.3	53.1375	33.4	1	25.05	32.4	1.6	38.88	44.6	1.2	40.14	29.8	1.2	26.82	32.7	1	24.525	29.7	1.7	37.8675	28.1	2.3	48.4725	39.3	2.3	67.7925	30.1	2.1	47.4075	33	1.9	47.025	41.5	1.6	49.8	52	1.7	66.3	42.5	1.3	41.4375	38	1.4
46.2	1.4	48.51	46	1	34.5	32.3	1.6	38.76	32.1	1.5	36.1125	44	1.7	56.1	49	1	36.75	39.5	1	29.625	28.7	1	21.525	25	1.3	24.375	28.6	2.3	49.335	53.3	1.6	63.96	37.6	2	56.4	38.5	2.2	63.525	53	1.9	75.525	30	2	45	25.2	1.7	32.13	28.4	1.9
32.5	1.6	39	27.9	1.6	33.48	33.2	1.8	44.82	38.6	1	28.95	50.5	1.2	45.45	48.8	1	36.6	32.6	1	24.45	28	1.4	29.4	48.5	1.3	47.2875	42.4	1.7	54.06	42.9	2.2	70.785	29.3	2.1	46.1475	29.6	2.2	48.84	50.5	1.9	71.9625	33	1.7	42.075	24.7	1.5	27.7875	31.2	2
39.7	1.5	44.6625	38	1.1	31.35	47.5	1.4	49.875	20	1.2	18	35.5	1.6	42.6	34.4	1.5	38.7	18.8	1.3	18.33	24.4	1.2	21.96	30.3	1.5	34.0875	39.8	2.2	65.67	30.9	2.3	53.3025	43.8	1.8	59.13	26.8	1.8	36.18	32.3	1.8	43.605	53.2	1.6	63.84	37	1.3	36.075	39.5	1.1
50	1.2	45	25.8	1.4	27.09	48.3	1.7	61.5825	48.3	1.1	39.8475	29	1.7	36.975	46.5	1	34.875	27.6	1.3	26.91	41.7	1	31.275	48.5	1.5	54.5625	44	1.6	52.8	56	2	84	56.5	1.5	63.5625	26.1	2	39.15	49	1.8	66.15	53.3	1.5	59.9625	32.7	1.3	31.8825	24	1.6
40.4	1.5	45.45	29	1.6	34.8	45.1	1.7	57.5025	24	1.5	27	52	1	39	28	1.6	33.6	35.5	1.3	34.6125	28.1	1.5	31.6125	43.5	1.4	45.675	34.2	1.7	43.605	52.7	2.1	83.0025	41	1.8	55.35	32.3	2	48.45	53	1.9	75.525	43	2	64.5	24.8	1.5	27.9	41.1	1.3
44.2	1.3	43.095	46.5	1	34.875	54.4	1.1	44.88	37.2	1	27.9	55.5	1.1	45.7875	31.3	1.5	35.2125	35.3	1	26.475	44.9	1	33.675	32	1.5	36	33.5	1.8	45.225	49	1.4	51.45	46.2	1.3	45.045	44.5	1.7	56.7375	50	2.3	86.25	41.3	2.1	65.0475	41.5	1.1	34.2375	22.4	1.6
34	1.5	38.25	25.3	1.6	30.36	33.6	1.7	42.84	25.9	1.2	23.31	26.7	1.6	32.04	30.4	1.5	34.2	27.2	1.3	26.52	31.9	1.4	33.495	38.2	1.4	40.11	43.7	1.5	49.1625	47.4	1.5	53.325	34.2	2	51.3	41	1.5	46.125	48	2.5	90	57	2.1	89.775	32.6	1.8	44.01	49.2	1.3
		889.312			603.472			1000.49			599.46			846.81			780.405			541.965			611.385			781.822			1067.87			1300.76			1111.49			1067.5			1329.06			1172.78			745.702
	Total leaf area (cm 2)	Total leaf area（m²）	Leaf samples(g)	Total leaf weight（g）	Specific leaf weight（g/m²）	Leaf area of 5 stumps（m²）	Leaf area of 1 stumps（m²）	（LAI）
一F1A	889.312	0.0889313	3.94	20.77	44.3039	0.468808	0.0937615	2.23242
二F1A	603.472	0.0603472	2.57	19.32	42.5869	0.453661	0.0907322	2.16029
三F1A	1000.49	0.100048	4.36	25.45	43.5789	0.583999	0.1168	2.78095
一F2A	599.46	0.059946	2.95	8.18	49.211	0.166223	0.0332446	0.791539
二F2A	846.81	0.084681	3.8	24.06	44.8743	0.536164	0.107233	2.55316
三F2A	780.405	0.0780405	3.46	18.71	44.336	0.422005	0.084401	2.00955
一F3A	541.965	0.0541965	2.71	13.8	50.0032	0.275982	0.0551964	1.3142
二F3A	611.385	0.0611385	2.73	13.93	44.6527	0.311963	0.0623926	1.48554
三F3A	781.822	0.0781822	3.66	18.5	46.8137	0.395184	0.0790367	1.88183
一F1B	1067.87	0.106787	4.07	36.46	38.1132	0.956625	0.191325	4.55536
二F1B	1300.76	0.130076	5.48	23.11	42.1294	0.548548	0.10971	2.61213
三F1B	1111.49	0.111149	4.6	19.46	41.3858	0.47021	0.0940419	2.23909
一F2B	1067.5	0.10675	4.43	17.86	41.4989	0.430373	0.0860745	2.04939
二F2B	1329.06	0.132906	5.57	22.05	41.9093	0.526136	0.105227	2.50541
三F2B	1172.78	0.117278	5.52	19.48	47.0679	0.413871	0.0827741	1.97081
一F3B	745.702	0.0745703	3.46	11.45	46.3992	0.246771	0.0493543	1.1751
二F3B	1097.54	0.109754	3.2	11.15	29.1562	0.382422	0.0764845	1.82106
三F3B	1131.27	0.113127	4.62	20.08	40.8391	0.491686	0.0983372	2.34136
一F1C	1278.22	0.127822	5.77	51.41	45.141	1.13888	0.227775	5.42322
二F1C	1052.03	0.105203	4.9	23.23	46.5765	0.498749	0.0997499	2.375
三F1C	1170.08	0.117008	5.52	37.17	47.1762	0.787898	0.15758	3.75189
一F2C	945.413	0.0945412	4.83	21.39	51.0888	0.418683	0.0837365	1.99373
二F2C	1195.09	0.119509	5.31	34.12	44.4319	0.767917	0.153583	3.65675
三F2C	1069.5	0.10695	5.49	26.49	51.3324	0.516048	0.10321	2.45737
一F3C	539.4	0.05394	2.74	9.68	50.7972	0.190562	0.0381124	0.907437
二F3C	559.47	0.055947	3.22	13.87	57.5545	0.240989	0.0481978	1.14757
三F3C	735.015	0.0735015	3.64	16.2	49.5228	0.327122	0.0654244	1.55772
一F1D	1192.69	0.119269	5.64	39.55	47.2882	0.836362	0.167272	3.98267
二F1D	1117.19	0.111719	4.89	27.69	43.7704	0.632619	0.126524	3.01247
三F1D	1215.29	0.121529	6.16	33.47	50.6874	0.660322	0.132064	3.14439
一F2D	940.553	0.0940553	5.09	22.08	54.1171	0.408004	0.0816008	1.94288
二F2D	1349.94	0.134994	6.74	36.75	49.9281	0.736058	0.147212	3.50504
三F2D	934.575	0.0934575	4.84	27.33	51.7882	0.527726	0.105545	2.51298
一F3D	909.878	0.0909878	5	22	54.9525	0.400346	0.0800692	1.90641
二F3D	957.952	0.0957952	4.06	13.49	42.3821	0.318295	0.063659	1.51569
三F3D	711.435	0.0711435	4.68	25.21	65.7825	0.383232	0.0766465	1.82492
[truncated: 58 more columns]

## Sheet: late season Binyang
一F1A			二F1A			三F1A			一F2A			二F2A			三F2A			一F3A			二F3A			三F3A			一F1B			二F1B			三F1B			一F2B			二F2B			三F2B			一F3B			二F3B
Length/cm	width/cm		Length/cm	width/cm		Length/cm	width/cm		Length/cm	width/cm		Length/cm	width/cm		Length/cm	width/cm		Length/cm	width/cm		Length/cm	width/cm		Length/cm	width/cm		Length/cm	width/cm		Length/cm	width/cm		Length/cm	width/cm		Length/cm	width/cm		Length/cm	width/cm		Length/cm	width/cm		Length/cm	width/cm		Length/cm	width/cm
29.4	1.5	33.075	28.8	0.9	19.44	36	1	27	26.4	1.2	23.76	30.7	0.9	20.7225	33.7	1.1	27.8025	32.8	0.7	17.22	26	1	19.5	24.9	0.7	13.0725	48	1.3	46.8	33.5	1.6	40.2	46.7	1.2	42.03	42	1.7	53.55	31.8	1.2	28.62	23.5	1.2	21.15	39.6	1	29.7	31.1	1.4
30.5	1.6	36.6	38.4	0.9	25.92	38	1.6	45.6	25.7	1.2	23.13	32.1	0.9	21.6675	30	1.6	36	30	0.6	13.5	33	0.8	19.8	31.2	1	23.4	50.6	1.3	49.335	32.2	1.2	28.98	45.1	1.3	43.9725	49.6	0.9	33.48	29.4	1.3	28.665	31.8	1	23.85	34.4	1.2	30.96	40.9	1.3
29.8	1.6	35.76	38.9	1.4	40.845	27	1.4	28.35	39.5	0.9	26.6625	28.1	0.9	18.9675	27	1.5	30.375	31.5	0.8	18.9	28.4	1.1	23.43	28.4	1.2	25.56	46.3	1.1	38.1975	34.5	1.5	38.8125	35.5	1.3	34.6125	32.1	1.5	36.1125	26.4	1.5	29.7	34.4	0.9	23.22	46.2	1.2	41.58	28.5	1.6
38.4	1.6	46.08	31.2	0.9	21.06	29.2	1.5	32.85	27.1	1.3	26.4225	26.2	1.1	21.615	29	1	21.75	27	1	20.25	25.1	1.3	24.4725	31.4	0.9	21.195	46.9	1.4	49.245	29.4	1	22.05	52.5	1.3	51.1875	39.4	1.4	41.37	41.1	1	30.825	33.1	1.5	37.2375	45.9	1.2	41.31	37.6	1.5
49	1	36.75	31.5	1.4	33.075	30.7	1.2	27.63	32.5	1.2	29.25	25.5	1.2	22.95	22.2	1.3	21.645	22.8	0.7	11.97	29.4	1.1	24.255	29.5	0.6	13.275	51	1.4	53.55	35.7	1.5	40.1625	44.9	1.5	50.5125	52.1	1.2	46.89	36.9	1.2	33.21	45.6	0.9	30.78	31.5	1.4	33.075	32.7	1.2
46.4	1.1	38.28	32.9	0.9	22.2075	25.4	1.1	20.955	35.5	1.4	37.275	32	1	24	20.8	1.6	24.96	28.3	0.7	14.8575	28.4	1.1	23.43	28.8	1	21.6	48.6	1.1	40.095	28.3	1.9	40.3275	45.4	1.3	44.265	30.8	2	46.2	26.2	1.8	35.37	52.4	1.2	47.16	28.2	1.9	40.185	22.7	1.7
41.9	1	31.425	30.3	0.9	20.4525	28.4	1.5	31.95	32	1.2	28.8	29.5	1.4	30.975	27.7	1.4	29.085	23	0.8	13.8	23.8	1.2	21.42	35	0.6	15.75	45.5	1.5	51.1875	41.5	1.3	40.4625	48.2	1.5	54.225	29.8	1.4	31.29	29.2	1.5	32.85	33.5	1.5	37.6875	24	1.6	28.8	22.5	1.1
30.4	1.6	36.48	35	1.5	39.375	28.5	1.5	32.0625	24.9	1.4	26.145	23.8	1.4	24.99	26.7	1.4	28.035	30.4	0.8	18.24	29.9	0.9	20.1825	25.8	0.8	15.48	51.3	1.9	73.1025	51	1.4	53.55	57.8	1.4	60.69	45.2	1.2	40.68	30.1	1.3	29.3475	29.7	1.5	33.4125	25.4	1.6	30.48	25.6	1.2
45.5	1.1	37.5375	39.6	1.2	35.64	32.5	1.1	26.8125	30.5	1.3	29.7375	24.1	1.1	19.8825	26.8	1.1	22.11	25.5	1.3	24.8625	27.4	1	20.55	28.4	1	21.3	47.4	1.3	46.215	30	2.2	49.5	43.3	1.1	35.7225	34.9	1.3	34.0275	27	1.6	32.4	49.9	1.3	48.6525	27	1.6	32.4	22	1.5
28.2	1.5	31.725	42.4	1.2	38.16	26.5	1.5	29.8125	47.8	0.9	32.265	28.5	1.4	29.925	25.2	1.1	20.79	37.8	0.6	17.01	19.8	1.2	17.82	25.4	1.3	24.765	51.5	1.3	50.2125	49.6	1.3	48.36	46.3	1.2	41.67	54.3	1.3	52.9425	37.3	1.1	30.7725	55	1.1	45.375	43.2	0.8	25.92	29.5	1
35.5	1.1	29.2875	42.5	1.2	38.25	36.8	1	27.6	31.6	0.9	21.33	31	1.1	25.575	23.5	1	17.625	22	1.1	18.15	27.2	0.9	18.36	25.2	0.9	17.01	47.1	1.2	42.39	39.3	1.4	41.265	46.3	1.1	38.1975	30.2	2.1	47.565	25.2	1.3	24.57	33.7	1.1	27.8025	28.2	1.6	33.84	34	1.6
47.4	0.8	28.44	32.8	1.1	27.06	31.7	1.2	28.53	26.6	1.4	27.93	24.6	1.4	25.83	30.7	1.5	34.5375	26.9	0.7	14.1225	21.5	1.2	19.35	25	0.9	16.875	46	1.2	41.4	32	1.6	38.4	41.7	1.3	40.6575	26	1.6	31.2	34	1.9	48.45	28.3	0.9	19.1025	27.5	1.2	24.75	43.2	1.1
35.8	1.2	32.22	39.5	1.1	32.5875	31	1.1	25.575	25.5	1.2	22.95	33	1.9	47.025	28.7	1.5	32.2875	25.8	0.8	15.48	21.5	1.3	20.9625	24.5	0.9	16.5375	51.6	1.3	50.31	32.6	2.2	53.79	50	1	37.5	29.9	1.4	31.395	28.8	1.2	25.92	38.4	1.2	34.56	28.6	1.7	36.465	37.4	1.3
38.6	1.2	34.74	42.7	1.1	35.2275	38.9	0.7	20.4225	30	1	22.5	25.9	1.6	31.08	30.5	1.3	29.7375	26.6	0.8	15.96	21.6	1.1	17.82	30	0.9	20.25	44.6	1	33.45	57.3	1.1	47.2725	52.1	1	39.075	28	1.5	31.5	27.2	1.7	34.68	41.8	1.2	37.62	34.5	1.3	33.6375	26.9	1.6
38.1	0.9	25.7175	40.3	1.6	48.36	30.1	1.3	29.3475	29.5	1.3	28.7625	26.1	1.6	31.32	22.4	1.1	18.48	26.2	0.9	17.685	25.5	1.7	32.5125	35.6	0.9	24.03	46.8	1	35.1	30	2.1	47.25	36.3	1.9	51.7275	34.5	2	51.75	35.2	1.3	34.32	45.2	1.4	47.46	31.2	1.3	30.42	27	1.2
39	0.9	26.325	41.2	1	30.9	32.1	1	24.075	27.4	0.9	18.495	29.9	0.9	20.1825	28.2	1	21.15	26.3	0.7	13.8075	31.9	1	23.925	26.3	1	19.725	46.3	1.5	52.0875	46.2	1.5	51.975	46	1.2	41.4	53.5	1.4	56.175	34.5	1.5	38.8125	32.8	1.3	31.98	33.1	1.3	32.2725	37	1.3
28.6	1.5	32.175	33.5	1.1	27.6375	27.2	1.3	26.52	23	1.3	22.425	30.6	1.1	25.245	26.3	1.2	23.67	26.5	0.8	15.9	28	0.9	18.9	35.3	0.6	15.885	48	1.4	50.4	26	2	39	51.2	1.1	42.24	29.7	1.8	40.095	23.5	1.7	29.9625	23	1.7	29.325	34.6	1.2	31.14	25.8	1.3
36.6	1.9	52.155	35.5	1.1	29.2875	24.1	1.2	21.69	24.5	1.1	20.2125	32.5	1.1	26.8125	25.2	1.4	26.46	23.5	0.8	14.1	23.7	1.2	21.33	26.1	1.2	23.49	53.8	1.2	48.42	31	1.9	44.175	53.8	1.2	48.42	31.6	1.3	30.81	36.1	2	54.15	38.4	1.2	34.56	30.6	0.9	20.655	31.4	1.1
30.4	1.6	36.48	24.7	1.4	25.935	31.5	1.2	28.35	27.5	1.2	24.75	25.3	1.4	26.565	30.5	1.1	25.1625	28.9	0.9	19.5075	20.5	0.9	13.8375	26.5	1	19.875	45.2	1.1	37.29	53.6	0.8	32.16	33.9	1.7	43.2225	29.3	1.5	32.9625	26.8	1.7	34.17	43.2	1.1	35.64	35.8	1.4	37.59	23.5	1.9
31.2	1.2	28.08	32.5	1.5	36.5625	32.3	1.4	33.915	27.8	1.1	22.935	23.7	1.3	23.1075	37.7	1	28.275	34.1	0.6	15.345	27.7	1	20.775	25.5	0.9	17.2125	57	1	42.75	26	1.7	33.15	54	1.3	52.65	33.7	2	50.55	43.9	0.8	26.34	32.5	1.9	46.3125	42.2	1.1	34.815	33	1.1
		689.332			627.982			569.048			515.737			518.438			519.938			330.668			422.632			386.288			931.538			830.842			893.977			820.545			663.135			692.888			649.995
	Total leaf area (cm 2)	Total leaf area（m²）	Leaf samples(g)	Total leaf weight（g）	Specific leaf weight（g/m²）	Leaf area of 5 stumps（m²）	Leaf area of 1 stumps（m²）	（LAI）
一F1A	689.332	0.0689333	2.88	21.81	41.7795	0.522026	0.104405	2.48584
二F1A	627.982	0.0627982	2.64	26.27	42.0394	0.62489	0.124978	2.97567
三F1A	569.048	0.0569047	2.56	22.83	44.9875	0.507475	0.101495	2.41655
一F2A	515.737	0.0515738	2.43	6.46	47.117	0.137106	0.0274211	0.652883
二F2A	518.438	0.0518438	2.34	15.85	45.1356	0.351164	0.0702328	1.67221
三F2A	519.938	0.0519937	2.24	20.23	43.0821	0.469569	0.0939137	2.23604
一F3A	330.668	0.0330667	1.82	12.93	55.0402	0.234919	0.0469839	1.11866
二F3A	422.632	0.0422633	1.77	10.83	41.8804	0.258594	0.0517188	1.2314
三F3A	386.288	0.0386288	1.88	19.3	48.6684	0.396561	0.0793122	1.88839
一F1B	931.538	0.0931537	3.75	28.98	40.256	0.719892	0.143978	3.42806
二F1B	830.842	0.0830842	3.28	25	39.478	0.633264	0.126653	3.01554
三F1B	893.977	0.0893977	3.93	22.69	43.9608	0.516141	0.103228	2.45782
一F2B	820.545	0.0820545	3.62	25.66	44.117	0.581635	0.116327	2.76969
二F2B	663.135	0.0663135	2.83	9.28	42.6761	0.217452	0.0434904	1.03549
三F2B	692.888	0.0692887	3.14	9.7	45.3176	0.214045	0.042809	1.01926
一F3B	649.995	0.0649995	2.99	10.67	46.0004	0.231955	0.0463909	1.10455
二F3B	613.215	0.0613215	2.5	14.26	40.7687	0.349778	0.0699556	1.66561
三F3B	689.183	0.0689183	2.67	10.67	38.7416	0.275415	0.055083	1.3115
一F1C	647.783	0.0647782	3.13	13.84	48.3187	0.286432	0.0572863	1.36396
二F1C	654.765	0.0654765	2.87	17.97	43.8325	0.40997	0.0819939	1.95224
三F1C	698.4	0.06984	3.17	32.35	45.3895	0.712721	0.142544	3.39391
一F2C	600.52	0.060052	2.64	14.15	43.9619	0.32187	0.0643739	1.53271
二F2C	614.467	0.0614468	2.75	13.67	44.7542	0.305446	0.0610892	1.45451
三F2C	543.405	0.0543405	2.45	12.06	45.0861	0.267488	0.0534977	1.27375
一F3C	417.48	0.041748	1.97	8.21	47.1879	0.173985	0.0347971	0.828502
二F3C	410.1	0.04101	2.06	10.52	50.2317	0.20943	0.0418859	0.997284
三F3C	392.265	0.0392265	1.82	7.12	46.3972	0.153458	0.0306915	0.73075
一F1D	784.515	0.0784515	3.66	6.11	46.653	0.130967	0.0261934	0.623652
二F1D	992.415	0.0992415	4.52	15.33	45.5455	0.336587	0.0673174	1.60279
三F1D	727.11	0.072711	3.13	10.31	43.0471	0.239505	0.047901	1.1405
一F2D	653.91	0.065391	3.13	7.56	47.8659	0.157941	0.0315882	0.752101
二F2D	800.475	0.0800475	3.74	11.5	46.7223	0.246135	0.0492271	1.17207
三F2D	854.062	0.0854063	4.02	22.99	47.0692	0.48843	0.0976861	2.32586
一F3D	655.305	0.0655305	2.97	8.73	45.3224	0.19262	0.038524	0.917238
二F3D	736.163	0.0736162	3.3	10.79	44.8271	0.240703	0.0481406	1.1462
三F3D	639.533	0.0639533	3.08	8.47	48.1602	0.175871	0.0351743	0.837483
[truncated: 55 more columns]

## Sheet: late season Yulin
一F1A			二F1A			三F1A			一F2A			二F2A			三F2A			一F3A			二F3A			三F3A			一F1B			二F1B			三F1B			一F2B			二F2B			三F2B			一F3B			二F3B
Length/cm	width/cm		Length/cm	width/cm		Length/cm	width/cm		Length/cm	width/cm		Length/cm	width/cm		Length/cm	width/cm		Length/cm	width/cm		Length/cm	width/cm		Length/cm	width/cm		Length/cm	width/cm		Length/cm	width/cm		Length/cm	width/cm		Length/cm	width/cm		Length/cm	width/cm		Length/cm	width/cm		Length/cm	width/cm		Length/cm	width/cm
36.5	1.2	32.85	40	1.2	36	32.3	1.2	29.07	34.8	1.2	31.32	40.2	1.1	33.165	40.5	1.3	39.4875	33.7	1.3	32.8575	33	1.3	32.175	42.2	1.2	37.98	42.4	1.9	60.42	41.9	1.9	59.7075	56	1.6	67.2	48.7	2.1	76.7025	34.2	1.3	33.345	54.7	1.7	69.7425	38.3	2	57.45	38.2	1
28	1.5	31.5	35.2	1.2	31.68	40.8	1.5	45.9	31.2	1.1	25.74	35.5	1.3	34.6125	33	1.3	32.175	30	1.3	29.25	29.8	1.4	31.29	33.9	0.9	22.8825	37	2.1	58.275	45	1.5	50.625	44.5	1.8	60.075	49.8	1.2	44.82	41	1.9	58.425	54.6	1.2	49.14	50.7	1.6	60.84	37.3	1.3
34	1.5	38.25	45.5	1.7	58.0125	44.2	1	33.15	39.5	1.2	35.55	46.6	1	34.95	32.5	1.2	29.25	35	1	26.25	33.1	1.2	29.79	30	1.4	31.5	40.2	2.4	72.36	49.5	1.5	55.6875	46	1.5	51.75	44	1.8	59.4	46	1.5	51.75	46	1.2	41.4	34.8	1.3	33.93	45	1.7
38	1.3	37.05	47.6	1.2	42.84	40.3	1.4	42.315	38	1	28.5	31	1	23.25	35.7	1.5	40.1625	28.5	1.1	23.5125	35	1.1	28.875	36.6	1.1	30.195	48.9	1.7	62.3475	34.5	2	51.75	53.3	1.6	63.96	42.9	1.5	48.2625	41.6	1.7	53.04	34.9	1.5	39.2625	35	2	52.5	37	1.2
30.5	1	22.875	38	1	28.5	43.8	1.2	39.42	36.8	1.2	33.12	41.7	1.1	34.4025	43.2	1.2	38.88	31.1	1.3	30.3225	39.2	1.1	32.34	44.4	1	33.3	40.4	2.3	69.69	50.5	1.3	49.2375	45.3	1.5	50.9625	50.4	1.5	56.7	44.8	1.4	47.04	39.2	1.7	49.98	45.4	1.6	54.48	41.5	1.3
32	1.5	36	43	1.2	38.7	49.1	1.1	40.5075	42	1	31.5	32.3	1.3	31.4925	30.8	1.5	34.65	29.2	0.9	19.71	36	0.8	21.6	40.1	1	30.075	51.5	1.9	73.3875	35.9	2.2	59.235	50.5	1.3	49.2375	57.3	2	85.95	49.8	1.4	52.29	49.2	1.2	44.28	43	1.5	48.375	44.8	1.4
35	1.1	28.875	36.5	1.2	32.85	49.4	2.2	81.51	42.3	1	31.725	33.4	1.5	37.575	37.8	1.1	31.185	37.2	1.4	39.06	31.7	1.4	33.285	34.5	1	25.875	49.4	1.8	66.69	54	1.5	60.75	32.3	1.9	46.0275	42.5	2.5	79.6875	43.6	1.4	45.78	32.5	1.3	31.6875	39.9	1.4	41.895	32.5	1
28	1	21	44	1	33	46.5	2.1	73.2375	36	1.3	35.1	31.4	1	23.55	34.7	1	26.025	41.8	1	31.35	35	1	26.25	36	1	27	50.1	1.3	48.8475	49.4	1.6	59.28	45.9	1.6	55.08	37.3	2.2	61.545	41.5	1.3	40.4625	37.4	1.6	44.88	36.4	2.1	57.33	31.5	1
50.5	1	37.875	40	1.2	36	49.2	1.1	40.59	32.6	1.2	29.34	36.4	0.9	24.57	38.3	1.5	43.0875	32	1	24	29.9	1	22.425	41	1	30.75	36	1.3	35.1	34	1.9	48.45	41.2	1.7	52.53	44.2	1.7	56.355	40	1.5	45	32.8	2.3	56.58	35.8	1.5	40.275	45.2	1.2
46	1	34.5	36	1.5	40.5	49.1	1.3	47.8725	32.8	1.2	29.52	40.3	1	30.225	29.7	1.3	28.9575	30	1.4	31.5	44.3	1.1	36.5475	32.2	0.9	21.735	37.5	1.7	47.8125	34.8	2.2	57.42	44	1.7	56.1	43.5	1.9	61.9875	49	1.5	55.125	39.4	2.5	73.875	41	1.5	46.125	36.6	1.6
38	1	28.5	33.7	1.5	37.9125	46.6	1.2	41.94	33.6	1	25.2	42.7	1.2	38.43	36.3	1	27.225	41.6	1.1	34.32	34	1	25.5	39.5	1	29.625	49.8	1.7	63.495	43	1.6	51.6	42.6	1.6	51.12	56.5	1.7	72.0375	45.8	1.3	44.655	32.9	1.6	39.48	46.4	1.3	45.24	45.5	1.5
41.2	1.5	46.35	35.6	1.2	32.04	37.5	1.4	39.375	33.7	0.9	22.7475	48.8	1	36.6	33.2	1.5	37.35	32	1.3	31.2	29.5	1.5	33.1875	37.7	1.2	33.93	44.3	1.7	56.4825	48.2	1.6	57.84	37	1.6	44.4	41.5	2.4	74.7	36.2	2.3	62.445	44.7	1.6	53.64	53.5	1.6	64.2	41.5	1.5
40.8	1.2	36.72	28	1.5	31.5	41.5	1.8	56.025	47.3	1	35.475	35	1.2	31.5	36.4	1.5	40.95	40.4	0.9	27.27	33.5	1.4	35.175	36.8	0.9	24.84	35.1	1.8	47.385	35	2.2	57.75	38.8	1.2	34.92	55.9	1.8	75.465	45	1.7	57.375	46.2	1.4	48.51	50.4	1.3	49.14	34	1.2
34.8	1	26.1	35.5	1.2	31.95	33.2	1.9	47.31	35.2	1.4	36.96	35.8	1	26.85	42	1	31.5	29.5	1.1	24.3375	46.5	1	34.875	34.5	1	25.875	37.2	1.9	53.01	36	2.2	59.4	47.5	1.5	53.4375	41	2.7	83.025	34.9	2.4	62.82	35	1.8	47.25	31.3	1.9	44.6025	43.5	1.7
34	1.5	38.25	34.5	1.5	38.8125	37.7	1	28.275	37	1.2	33.3	36.2	1.1	29.865	34.4	1.5	38.7	49.5	1.1	40.8375	41.2	1.1	33.99	31.5	1	23.625	37.7	1.6	45.24	37.5	1.5	42.1875	32	1.9	45.6	43	1.5	48.375	46.7	1.6	56.04	47.1	1.5	52.9875	37.6	1.5	42.3	47.5	1.3
44.4	1	33.3	36.5	1.5	41.0625	49.4	1.5	55.575	42.3	1.1	34.8975	42.5	1	31.875	40.8	1.5	45.9	39	1.1	32.175	30.3	1.3	29.5425	34.1	1	25.575	40.4	1.4	42.42	43.8	1.7	55.845	45.4	1.3	44.265	40.5	1.8	54.675	39.8	2.1	62.685	30.2	2	45.3	45.5	1.3	44.3625	49	1.3
48.8	1	36.6	38.2	1	28.65	36.4	1.8	49.14	35.2	1	26.4	37.7	1.2	33.93	41	1	30.75	37.2	1.5	41.85	38	1	28.5	31.1	1	23.325	41.8	2	62.7	39	1.6	46.8	31	1.4	32.55	38.5	2.5	72.1875	36.2	1.2	32.58	36	1.4	37.8	32.2	1.9	45.885	35.5	1.3
46	1.1	37.95	41.2	1.2	37.08	42.1	1.3	41.0475	33.7	1	25.275	32.8	1.1	27.06	47	0.9	31.725	36.6	1	27.45	30.8	1.1	25.41	33.8	0.8	20.28	57.8	1.3	56.355	43.6	1.5	49.05	39.5	1.6	47.4	56	1.7	71.4	45.7	1.7	58.2675	48.3	1.5	54.3375	41.9	1.3	40.8525	29.7	1.7
43	1.1	35.475	41.6	1.2	37.44	47.2	1.3	46.02	30	1.2	27	35.3	1.6	42.36	38	1	28.5	42.3	1.1	34.8975	31	1	23.25	33	1.1	27.225	48	1.6	57.6	53.5	1.4	56.175	38.6	1.5	43.425	52.5	1.9	74.8125	45.2	1.2	40.68	36.7	2.1	57.8025	31.3	2	46.95	41.5	1.4
45.2	1.1	37.29	38.9	1.5	43.7625	37.7	1.7	48.0675	31.2	1.5	35.1	46.7	1.1	38.5275	39.3	1.2	35.37	30.5	1.1	25.1625	36.5	1	27.375	38.5	1	28.875	36.6	1.6	43.92	52	1.7	66.3	42	1.7	53.55	52.3	1.8	70.605	42.5	1.2	38.25	36.5	2.1	57.4875	41.4	2.2	68.31	39.5	1.5
		677.31			738.293			926.347			613.77			644.79			691.83			607.312			591.383			554.467			1123.54			1095.09			1003.59			1328.69			998.055			995.423			985.043
	Total leaf area (cm 2)	Total leaf area（m²）	Leaf samples(g)	Total leaf weight（g）	Specific leaf weight（g/m²）	Leaf area of 5 stumps（m²）	Leaf area of 1 stumps（m²）	（LAI）
一F1A	677.31	0.067731	2.85	28.6	42.0782	0.679687	0.135937	3.2366
二F1A	738.293	0.0738292	3.2	25.76	43.3433	0.594325	0.118865	2.83012
三F1A	926.347	0.0926348	3.88	28.94	41.8849	0.690941	0.138188	3.29019
一F2A	613.77	0.061377	2.62	22.42	42.687	0.525218	0.105044	2.50104
二F2A	644.79	0.064479	2.82	25.04	43.7352	0.572537	0.114507	2.72637
三F2A	691.83	0.069183	3.32	22.09	47.9887	0.460317	0.0920634	2.19199
一F3A	607.312	0.0607313	2.87	17.77	47.2574	0.376026	0.0752052	1.7906
二F3A	591.383	0.0591383	2.73	21.09	46.163	0.456859	0.0913718	2.17552
三F3A	554.467	0.0554468	2.75	22.03	49.5971	0.444179	0.0888358	2.11514
一F1B	1123.54	0.112354	3.94	27.33	35.0678	0.779347	0.155869	3.71118
二F1B	1095.09	0.109509	4.07	17.61	37.1659	0.473821	0.0947643	2.25629
三F1B	1003.59	0.100359	3.72	25.17	37.0669	0.679042	0.135808	3.23353
一F2B	1328.69	0.132869	4.93	33.77	37.1041	0.910141	0.182028	4.334
二F2B	998.055	0.0998055	4.35	21.2	43.5848	0.486408	0.0972817	2.31623
三F2B	995.423	0.0995422	4	23.88	40.1839	0.594267	0.118853	2.82984
一F3B	985.043	0.0985043	3.98	20.58	40.4043	0.509351	0.10187	2.42548
二F3B	814.312	0.0814312	3.32	14.75	40.7706	0.36178	0.0723561	1.72276
三F3B	755.385	0.0755385	2.93	12.74	38.7882	0.328451	0.0656901	1.56405
一F1C	953.467	0.0953467	3.75	36.51	39.3301	0.928296	0.185659	4.42046
二F1C	867.278	0.0867278	4.2	31.42	48.4274	0.648806	0.129761	3.08955
三F1C	861.982	0.0861983	4.11	23.91	47.6808	0.50146	0.100292	2.3879
一F2C	935.595	0.0935595	4.33	28.98	46.2807	0.626179	0.125236	2.9818
二F2C	821.947	0.0821947	4.14	20.65	50.3682	0.409981	0.0819962	1.95229
三F2C	848.408	0.0848408	4.06	22.48	47.8544	0.469759	0.0939517	2.23695
一F3C	704.872	0.0704873	3.25	11.58	46.1076	0.251151	0.0502303	1.19596
二F3C	668.595	0.0668595	3.25	10.57	48.6094	0.217448	0.0434895	1.03547
三F3C	722.16	0.072216	3.66	19.62	50.6813	0.387125	0.077425	1.84345
一F1D	1191.67	0.119167	4.67	30.72	39.1885	0.783903	0.156781	3.73287
二F1D	961.597	0.0961598	3.86	22.14	40.1415	0.551548	0.11031	2.62642
三F1D	1029.59	0.102959	4.64	23.93	45.0664	0.530995	0.106199	2.52855
一F2D	937.92	0.093792	4.1	31.72	43.7137	0.72563	0.145126	3.45538
二F2D	692.82	0.069282	2.95	12.1	42.5796	0.284174	0.0568347	1.35321
三F2D	963.683	0.0963683	4.08	25.46	42.3376	0.601357	0.120271	2.8636
一F3D	830.16	0.083016	3.89	18.35	46.8584	0.391605	0.078321	1.86479
二F3D	1053.16	0.105316	4.63	20.04	43.9627	0.455841	0.0911681	2.17067
三F3D	692.505	0.0692505	3.11	11.47	44.9094	0.255403	0.0510806	1.2162
[truncated: 58 more columns]

## Sheet: late season Liucheng
一F1A			二F1A			三F1A			一F2A			二F2A			三F2A			一F3A			二F3A			三F3A			一F1B			二F1B			三F1B			一F2B			二F2B			三F2B			一F3B			二F3B
Length/cm	width/cm		Length/cm	width/cm		Length/cm	width/cm		Length/cm	width/cm		Length/cm	width/cm		Length/cm	width/cm		Length/cm	width/cm		Length/cm	width/cm		Length/cm	width/cm		Length/cm	width/cm		Length/cm	width/cm		Length/cm	width/cm		Length/cm	width/cm		Length/cm	width/cm		Length/cm	width/cm		Length/cm	width/cm		Length/cm	width/cm
39.2	1.2	35.28	35.7	2	53.55	35.3	1.3	34.4175	46	1.1	37.95	45	1.3	43.875	50.5	0.9	34.0875	34.5	1.1	28.4625	29.2	1.9	41.61	46.7	1	35.025	65	1.8	87.75	39	2.1	61.425	51	1.7	65.025	33.5	2.1	52.7625	44.2	2.1	69.615	47	2.5	88.125	42.8	1.5	48.15	42.6	1
39.6	1.4	41.58	36	1.6	43.2	31.3	1.3	30.5175	32.2	1.3	31.395	36.2	1.8	48.87	41.1	1.1	33.9075	41.4	1	31.05	32.5	1.5	36.5625	37.8	1	28.35	54.6	1.6	65.52	48.8	1.6	58.56	35	2.1	55.125	38.5	1.5	43.3125	44.8	1.9	63.84	55.5	2	83.25	39.5	1.5	44.4375	43.5	1.5
42.7	1.2	38.43	36.7	1.8	49.545	42.5	1.1	35.0625	36.5	1.7	46.5375	33.5	1.7	42.7125	40.6	1.4	42.63	37.9	1.2	34.11	24.5	1.3	23.8875	45.5	0.9	30.7125	56	1.6	67.2	56.1	1.5	63.1125	39	2.2	64.35	39.3	1.6	47.16	43.9	1.4	46.095	64	1.9	91.2	46.2	1.2	41.58	50.9	1.6
42	0.9	28.35	40.7	2	61.05	29.3	1.6	35.16	40.1	2	60.15	37.6	1.5	42.3	40.4	1.1	33.33	44.3	0.9	29.9025	34.5	1.6	41.4	32	1	24	37.5	2.3	64.6875	52.9	2.6	103.155	41.4	2.2	68.31	30.8	2	46.2	37.7	1.8	50.895	49.6	1.7	63.24	49	1.4	51.45	31.6	1.6
38.1	1.7	48.5775	38.2	1.3	37.245	39.1	2	58.65	47.2	1.2	42.48	36.6	1.4	38.43	51.3	0.9	34.6275	28	1.8	37.8	29.2	1	21.9	36.5	1	27.375	56	1.1	46.2	35.5	2.5	66.5625	39.9	2	59.85	41.5	1.3	40.4625	55.4	1.7	70.635	55.1	1.4	57.855	28.6	1.9	40.755	46.8	1.1
36.5	1.4	38.325	47.6	1.3	46.41	30.1	1.4	31.605	33.4	1.8	45.09	31.7	1.7	40.4175	38.6	1.2	34.74	36	1.5	40.5	37.2	1.2	33.48	38	1	28.5	40.7	1.6	48.84	51.2	1.6	61.44	50.5	1.5	56.8125	28.4	1.7	36.21	54	2.4	97.2	52.3	1.6	62.76	34	1.9	48.45	53	1.4
42	1.4	44.1	45.2	1	33.9	33	1.8	44.55	33.5	1.2	30.15	46.6	1.2	41.94	41.1	1	30.825	26.5	1.7	33.7875	42	1.1	34.65	46.5	1	34.875	38.5	2.2	63.525	41	1.9	58.425	54.7	1.7	69.7425	50.9	1.3	49.6275	52.3	1.5	58.8375	58.1	1.6	69.72	45.2	1.5	50.85	45.3	1.4
42.4	1.1	34.98	38.1	1.5	42.8625	29.1	1.4	30.555	40.7	1.1	33.5775	35.6	1.3	34.71	33.3	1	24.975	36.4	1.3	35.49	38.6	1.1	31.845	35.2	1	26.4	46.8	1.4	49.14	43.6	1.6	52.32	47.4	1.4	49.77	48.8	1.6	58.56	61	1.8	82.35	53.3	1.9	75.9525	42.9	1.4	45.045	53.2	1.3
34.2	1.6	41.04	47.3	1	35.475	48.4	1.3	47.19	37.6	1	28.2	37.4	1.1	30.855	31.9	1	23.925	51.5	1	38.625	37.9	1.1	31.2675	37.1	0.9	25.0425	38	2.2	62.7	47.3	2.3	81.5925	53	1.1	43.725	44.5	2.2	73.425	45.6	2.5	85.5	47.8	1.7	60.945	44.7	1.3	43.5825	37	1.9
46.6	1.1	38.445	45.5	1.1	37.5375	46.5	1.3	45.3375	34	1.6	40.8	33.1	1	24.825	52.5	1.4	55.125	38	0.8	22.8	37.1	1.2	33.39	33.5	1.2	30.15	51.4	1.5	57.825	50.5	1.5	56.8125	48	1.2	43.2	54.1	1.6	64.92	55	1.5	61.875	50.5	1.7	64.3875	32.2	1.4	33.81	34.6	1.6
38	1.1	31.35	36.8	2.4	66.24	35.6	1.8	48.06	40	1.6	48	30.6	1.4	32.13	40.5	1.5	45.5625	44	1	33	34.7	1.4	36.435	49.6	1.4	52.08	46	1.5	51.75	34.7	2.5	65.0625	56.1	1.6	67.32	35.6	2.2	58.74	44.5	1.9	63.4125	39.8	2.1	62.685	49.8	1.3	48.555	42.7	1.3
39.9	1.1	32.9175	55	1.9	78.375	47	1.5	52.875	29.6	1.6	35.52	36.7	0.9	24.7725	30.4	1.5	34.2	42.7	1.1	35.2275	46.2	1.2	41.58	44.9	0.9	30.3075	48.2	2.3	83.145	38.2	2.5	71.625	58	1.5	65.25	56.4	1.5	63.45	40.9	2.1	64.4175	44	1.6	52.8	41.9	1.6	50.28	39.7	1.7
34.8	1	26.1	44.2	1.3	43.095	35.2	2	52.8	34.3	1.8	46.305	44.4	1.2	39.96	49	1	36.75	41.2	1.1	33.99	37.3	1.1	30.7725	39	1	29.25	63.9	1.6	76.68	41.9	1.6	50.28	43.8	2	65.7	44.4	2.2	73.26	37	2.2	61.05	43.6	1.6	52.32	50	1.2	45	48.5	1.3
37.1	1.7	47.3025	36.4	2.2	60.06	30	1.6	36	33.4	1.6	40.08	47.4	1.3	46.215	30.7	1.5	34.5375	31.2	0.9	21.06	44.5	0.9	30.0375	35.1	1	26.325	55.6	1.7	70.89	55.5	1.4	58.275	35.5	2	53.25	39.4	1.5	44.325	45.2	1.5	50.85	50.5	2	75.75	35.5	1.2	31.95	56.4	1.2
39.7	1.3	38.7075	44.6	1.2	40.14	51	1.1	42.075	30.3	1.6	36.36	36.8	1.7	46.92	44	1.3	42.9	42.3	0.9	28.5525	45.2	1	33.9	36.3	1	27.225	39.8	2.3	68.655	45.5	1.1	37.5375	53	1.6	63.6	35.2	2.4	63.36	48.1	1.5	54.1125	38.1	1.5	42.8625	31	2	46.5	43	1.4
38.6	1.5	43.425	29	1.7	36.975	40.3	1.2	36.27	43.5	1	32.625	35.1	1.5	39.4875	32.1	2	48.15	29.6	1	22.2	39.8	1.3	38.805	43.6	1	32.7	44.1	2.3	76.0725	55.3	1.8	74.655	44	1	33	59.5	1.5	66.9375	51.5	1.8	69.525	37.4	2.1	58.905	32	1.2	28.8	36.5	1.8
40.7	1.3	39.6825	44.6	1.2	40.14	37.2	0.9	25.11	45	1.5	50.625	39.4	0.9	26.595	35.5	0.8	21.3	32	1.5	36	40.5	1.3	39.4875	39.4	1.1	32.505	58.5	1.6	70.2	36.2	2.4	65.16	38.5	2.1	60.6375	52.5	1.2	47.25	40.2	2	60.3	38.1	2.5	71.4375	37.8	2	56.7	44.7	1.7
40.9	1	30.675	50	1.8	67.5	30.6	1.8	41.31	48.5	1	36.375	36.5	1.5	41.0625	35.5	1.1	29.2875	32.5	1.4	34.125	33.3	1.7	42.4575	40.1	1.1	33.0825	41.9	2.2	69.135	45.1	2.5	84.5625	42	2.2	69.3	49.4	1.9	70.395	59	1.7	75.225	46.6	2.3	80.385	32.3	1.8	43.605	38.4	1
46.8	1.1	38.61	31	2.4	55.8	40.8	1.5	45.9	44	0.9	29.7	27.5	1.1	22.6875	42.5	1.2	38.25	30.8	1.3	30.03	33.5	1.9	47.7375	33.8	1.5	38.025	58	2.3	100.05	63.8	1.6	76.56	44.2	1.5	49.725	44.1	1.5	49.6125	40	2	60	55.8	1.6	66.96	38.5	1.4	40.425	40.4	1.8
48.6	1.1	40.095	34.6	1.1	28.545	33.5	1.9	47.7375	39	1.1	32.175	35.3	1.5	39.7125	36.4	1.7	46.41	28.7	1.2	25.83	38.4	1.1	31.68	34.4	1.1	28.38	55	2.2	90.75	58	1.8	78.3	51.7	1.7	65.9175	56.1	1.8	75.735	39.3	2.1	61.8975	35	2.1	55.125	34.2	1.4	35.91	48.3	1.6
		757.972			957.645			821.183			784.095			748.477			725.52			632.543			702.885			620.31			1370.71			1325.42			1169.61			1125.7			1307.63			1336.66			875.835
	Total leaf area (cm 2)	Total leaf area（m²）	Leaf samples(g)	Total leaf weight（g）	Specific leaf weight（g/m²）	Leaf area of 5 stumps（m²）	Leaf area of 1 stumps（m²）	（LAI）
一F1A	757.972	0.0757972	2.96	22.97	39.0515	0.588197	0.117639	2.80094
二F1A	957.645	0.0957645	3.76	24.51	39.263	0.624252	0.12485	2.97263
三F1A	821.183	0.0821183	3.37	18.4	41.0384	0.448361	0.0896722	2.13505
一F2A	784.095	0.0784095	3.17	17.89	40.4288	0.442507	0.0885013	2.10717
二F2A	748.477	0.0748478	2.92	16.16	39.0125	0.414226	0.0828452	1.9725
三F2A	725.52	0.072552	2.97	14.77	40.9362	0.360806	0.0721611	1.71812
一F3A	632.543	0.0632542	2.62	14.32	41.4201	0.345726	0.0691451	1.64631
二F3A	702.885	0.0702885	3.06	11.54	43.5349	0.265075	0.053015	1.26226
三F3A	620.31	0.062031	2.78	11.89	44.8163	0.265305	0.053061	1.26336
一F1B	1370.71	0.137072	5.38	26.28	39.2496	0.669561	0.133912	3.18839
二F1B	1325.42	0.132542	4.74	18.56	35.7622	0.518984	0.103797	2.47135
三F1B	1169.61	0.116961	4.8	13.32	41.0393	0.324567	0.0649134	1.54556
一F2B	1125.7	0.112571	4.15	23.96	36.8658	0.649925	0.129985	3.09488
二F2B	1307.63	0.130763	6.02	22.39	46.0374	0.486344	0.0972687	2.31592
三F2B	1336.66	0.133666	5.47	15.87	40.9227	0.387804	0.0775608	1.84669
一F3B	875.835	0.0875835	3.53	15.49	40.3044	0.384325	0.0768651	1.83012
二F3B	950.842	0.0950842	4.04	12.7	42.4886	0.298903	0.0597807	1.42335
三F3B	1015.38	0.101538	4.25	13.38	41.8563	0.319666	0.0639331	1.52222
一F1C	1053.96	0.105396	4.3	28.59	40.7985	0.700761	0.140152	3.33696
二F1C	1076.27	0.107626	4.48	21.34	41.6254	0.512667	0.102533	2.44127
三F1C	955.612	0.0955613	3.97	22.35	41.544	0.537983	0.107597	2.56183
一F2C	888.87	0.088887	4.04	19.15	45.451	0.421333	0.0842666	2.00635
二F2C	914.633	0.0914632	4.3	20.14	47.0134	0.428388	0.0856777	2.03994
三F2C	964.972	0.0964973	4.27	17.53	44.25	0.396158	0.0792317	1.88647
一F3C	916.035	0.0916035	4.17	18.87	45.5223	0.414522	0.0829045	1.97392
二F3C	699.33	0.069933	3.28	14.94	46.902	0.318536	0.0637073	1.51684
三F3C	740.01	0.074001	3.53	13.28	47.7021	0.278395	0.0556789	1.32569
一F1D	1455.86	0.145586	6.79	29.39	46.639	0.630159	0.126032	3.00076
二F1D	1170.11	0.117011	4.04	25.92	34.5268	0.750721	0.150144	3.57486
三F1D	1086.46	0.108646	4.57	25.76	42.0633	0.61241	0.122482	2.91624
一F2D	1004.47	0.100447	4.24	27.01	42.2114	0.639874	0.127975	3.04702
二F2D	829.283	0.0829282	4.15	12.78	50.0433	0.255379	0.0510758	1.21609
三F2D	903.42	0.090342	4.49	16.82	49.7	0.33843	0.0676861	1.61157
一F3D	910.89	0.091089	3.83	15.68	42.0468	0.372918	0.0745836	1.7758
二F3D	863.812	0.0863813	3.92	13.09	45.3802	0.288452	0.0576903	1.37358
三F3D	950.535	0.0950535	4.52	13.09	47.5522	0.275277	0.0550553	1.31084
[truncated: 58 more columns]
