# Supplementary material for: Impact of fertilization with reducing in nitrogen and phosphorous application on growth, yield and biomass accumulation of rice (Oryza sativa L.) under a dual cropping system
Source: PeerJ. 2021 Jul 7;9:e11668. doi: 10.7717/peerj.11668 (PMC8272461; doi:10.7717/peerj.11668)
Supplement: Supplemental Information 2 [file peerj-09-11668-s002.xlsx]

## Sheet: early seanson heading DM
DM of early rice at full heading stage in Binyang						DM of early rice Yulin at full heading stage						DM of early rice at full heading stage in Liucheng						DM of early rice at full heading stage in Binyang										DM of early rice Yulin at full heading stage										DM of early rice at full heading stage in Liucheng
	stem	spike	leaf				stem	spike	leaf				stem	spike	leaf				stem	spike	leaf	Total weight（g）	Dry weight per hill（g）	Dry weight of plot（g）	DM（kg/亩）	DM(kg/ha)			stem	spike	leaf	Total weight（g）	Dry weight per hill（g）	Dry weight of plot（g）	DM（kg/亩）	DM(kg/ha)			stem	spike	leaf	Total weight（g）	Dry weight per hill（g）	Dry weight of plot（g）	DM（kg/亩）	DM(kg/ha)
F1A	46.41	56.29	28.57	131.27		F1A	82.36	51.55	65.04	198.95		F1A	62.04	33.31	23.77	119.12		一F1A	46.41	56.29	28.57	131.27	26.254	12601.9	416.732	6250.98		一F1A	82.36	51.55	65.04	198.95	39.79	17507.6	631.59	9473.86		一F1A	62.04	33.31	23.77	119.12	23.824	9529.6	378.161	5672.41
F1A	64.46	50.41	27.97	142.84		F1A	52.27	40.11	53.95	146.33		F1A	80.76	34.95	34.55	150.26		二F1A	64.46	50.41	27.97	142.84	28.568	13712.6	453.463	6801.94		二F1A	52.27	40.11	53.95	146.33	29.266	12877	464.542	6968.13		二F1A	80.76	34.95	34.55	150.26	30.052	12020.8	477.018	7155.27
F1A	63.69	49.55	34.56	147.8		F1A	64.63	42.49	55.96	163.08		F1A	69.47	34.03	28.29	131.79		三F1A	63.69	49.55	34.56	147.8	29.56	14188.8	469.209	7038.13		三F1A	64.63	42.49	55.96	163.08	32.616	14351	517.717	7765.75		三F1A	69.47	34.03	28.29	131.79	26.358	10543.2	418.383	6275.75
F2A	44.19	45.89	26	116.08		F2A	72.92	48.68	65.69	187.29		F2A	63.29	24.73	22.86	110.88		一F2A	44.19	45.89	26	116.08	23.216	11143.7	368.51	5527.65		一F2A	72.92	48.68	65.69	187.29	37.458	16481.5	594.574	8918.62		一F2A	63.29	24.73	22.86	110.88	22.176	8870.4	352.002	5280.03
F2A	54.15	46	30.86	131.01		F2A	81.7	44.78	83.88	210.36		F2A	80.14	35.84	36.98	152.96		二F2A	54.15	46	30.86	131.01	26.202	12577	415.907	6238.6		二F2A	81.7	44.78	83.88	210.36	42.072	18511.7	667.813	10017.2		二F2A	80.14	35.84	36.98	152.96	30.592	12236.8	485.59	7283.85
F2A	68.6	48.03	36.99	153.62		F2A	64.78	30.6	52.57	147.95		F2A	71.12	32.5	22.81	126.43		三F2A	68.6	48.03	36.99	153.62	30.724	14747.5	487.685	7315.27		三F2A	64.78	30.6	52.57	147.95	29.59	13019.6	469.685	7045.27		三F2A	71.12	32.5	22.81	126.43	25.286	10114.4	401.367	6020.51
F3A	39.37	22.53	19.19	81.09		F3A	60.42	21.16	50.51	46.67		F3A	38.89	16.42	17.38	72.69		一F3A	39.37	22.53	19.19	81.09	16.218	7784.64	257.43	3861.45		一F3A	60.42	21.16	50.51	132.09	26.418	11623.9	419.335	6290.03		一F3A	38.89	16.42	17.38	72.69	14.538	5815.2	230.763	3461.45
F3A	37.43	24.74	22.77	84.94		F3A	57.02	29.43	50.47	136.92		F3A	58.26	21.01	18.94	98.21		二F3A	37.43	24.74	22.77	84.94	16.988	8154.24	269.652	4044.78		二F3A	57.02	29.43	50.47	136.92	27.384	12049	434.669	6520.03		二F3A	58.26	21.01	18.94	98.21	19.642	7856.8	311.779	4676.69
F3A	73.38	46.83	25.49	145.7		F3A	53.75	28.31	45.74	127.8		F3A	52.56	25.47	29.81	107.84		三F3A	73.38	46.83	25.49	145.7	29.14	13987.2	462.542	6938.13		三F3A	53.75	28.31	45.74	127.8	25.56	11246.4	405.716	6085.74		三F3A	52.56	25.47	29.81	107.84	21.568	8627.2	342.351	5135.26
F1B	93.37	67.81	37.87	199.05		F1B	90.03	61.25	55.09	206.37		F1B	92.67	54.64	52.17	199.48		一F1B	93.37	67.81	37.87	199.05	39.81	19108.8	631.908	9478.62		一F1B	90.03	61.25	55.09	206.37	41.274	18160.6	655.146	9827.19		一F1B	92.67	54.64	52.17	199.48	39.896	15958.4	633.273	9499.1
F1B	68.7	64.91	41.61	175.22		F1B	87.03	69.71	52.55	139.29		F1B	53.34	31.69	25.14	110.17		二F1B	68.7	64.91	41.61	175.22	35.044	16821.1	556.257	8343.85		二F1B	87.03	69.71	52.55	139.29	27.858	12257.5	442.193	6632.89		二F1B	53.34	31.69	25.14	110.17	22.034	8813.6	349.748	5246.22
F1B	72.18	53.45	38.24	163.87		F1B	78.41	64.76	59.92	203.09		F1B	46.21	27.63	24.21	98.05		三F1B	72.18	53.45	38.24	163.87	32.774	15731.5	520.225	7803.37		三F1B	78.41	64.76	59.92	203.09	40.618	17871.9	644.733	9671		三F1B	46.21	27.63	24.21	98.05	19.61	7844	311.271	4669.07
F2B	71.28	60.87	41.67	173.82		F2B	95.39	59.2	61.08	215.67		F2B	77.75	34.87	34.97	147.59		一F2B	71.28	60.87	41.67	173.82	34.764	16686.7	551.812	8277.18		一F2B	95.39	59.2	61.08	215.67	43.134	18979	684.67	10270.1		一F2B	77.75	34.87	34.97	147.59	29.518	11807.2	468.542	7028.13
F2B	56.96	56.1	39.26	152.32		F2B	101.01	54.91	49.39	205.31		F2B	75.83	32.89	36.49	145.21		二F2B	56.96	56.1	39.26	152.32	30.464	14622.7	483.558	7253.37		二F2B	101.01	54.91	49.39	205.31	41.062	18067.3	651.781	9776.72		二F2B	75.83	32.89	36.49	145.21	29.042	11616.8	460.986	6914.8
F2B	67.26	57.01	39.58	163.85		F2B	74.12	46.84	50.96	171.92		F2B	73.8	35.33	35.69	144.82		三F2B	67.26	57.01	39.58	163.85	32.77	15729.6	520.161	7802.42		三F2B	74.12	46.84	50.96	171.92	34.384	15129	545.781	8186.71		三F2B	73.8	35.33	35.69	144.82	28.964	11585.6	459.748	6896.22
F3B	77.78	52.12	34.66	164.56		F3B	77.67	42,02	42.89	120.56		F3B	65.33	22.24	20.23	107.8		一F3B	77.78	52.12	34.66	164.56	32.912	15797.8	522.415	7836.23		一F3B	77.67	42,02	42.89	120.56	24.112	10609.3	382.732	5740.98		一F3B	65.33	22.24	20.23	107.8	21.56	8624	342.224	5133.36
F3B	62.65	48.82	40.64	152.11		F3B	83.83	46.4	39.8	170.03		F3B	77.19	28.1	33.96	139.25		二F3B	62.65	48.82	40.64	152.11	30.422	14602.6	482.891	7243.37		二F3B	83.83	46.4	39.8	170.03	34.006	14962.6	539.78	8096.71		二F3B	77.19	28.1	33.96	139.25	27.85	11140	442.066	6630.99
F3B	60.63	48.7	32.65	141.98		F3B	88.12	40.11	36.21	164.44		F3B	57.26	35.12	31.2	123.58		三F3B	60.63	48.7	32.65	141.98	28.396	13630.1	450.732	6760.99		三F3B	88.12	40.11	36.21	164.44	32.888	14470.7	522.034	7830.52		三F3B	57.26	35.12	31.2	123.58	24.716	9886.4	392.319	5884.79
F1C	51.27	42.04	54.42	147.73		F1C	99.69	53.04	58.22	210.95		F1C	97.53	47	42.28	186.81		一F1C	51.27	42.04	54.42	147.73	29.546	14182.1	468.986	7034.8		一F1C	99.69	53.04	58.22	210.95	42.19	18563.6	669.686	10045.3		一F1C	97.53	47	42.28	186.81	37.362	14944.8	593.051	8895.76
F1C	69.03	50.29	69.78	189.1		F1C	85.01	54.69	36.22	175.92		F1C	65.15	45.93	26.73	137.81		二F1C	69.03	50.29	69.78	189.1	37.82	18153.6	600.32	9004.81		二F1C	85.01	54.69	36.22	175.92	35.184	15481	558.479	8377.18		二F1C	65.15	45.93	26.73	137.81	27.562	11024.8	437.494	6562.41
F1C	50.57	50.83	69.23	170.63		F1C	87	54.46	33.96	175.42		F1C	86.66	51.49	48.14	186.29		三F1C	50.57	50.83	69.23	170.63	34.126	16380.5	541.685	8125.28		三F1C	87	54.46	33.96	175.42	35.084	15437	556.892	8353.38		三F1C	86.66	51.49	48.14	186.29	37.258	14903.2	591.4	8871
F2C	58.79	38.32	61.22	158.33		F2C	86.09	55.73	34.81	176.63		F2C	68.01	36.5	72.44	176.95		一F2C	58.79	38.32	61.22	158.33	31.666	15199.7	502.637	7539.56		一F2C	86.09	55.73	34.81	176.63	35.326	15543.4	560.733	8410.99		一F2C	68.01	36.5	72.44	176.95	35.39	14156	561.749	8426.23
F2C	52.83	61.68	84.72	199.23		F2C	52.83	37.48	47.34	137.65		F2C	71.65	42.03	50.74	164.42		二F2C	52.83	61.68	84.72	199.23	39.846	19126.1	632.479	9487.19		二F2C	52.83	37.48	47.34	137.65	27.53	12113.2	436.986	6554.79		二F2C	71.65	42.03	50.74	164.42	32.884	13153.6	521.971	7829.56
F2C	54.31	40.43	54.91	149.65		F2C	88.59	48.71	47.62	184.92		F2C	70	42.81	73.06	185.87		三F2C	54.31	40.43	54.91	149.65	29.93	14366.4	475.082	7126.23		三F2C	88.59	48.71	47.62	184.92	36.984	16273	587.051	8805.76		三F2C	70	42.81	73.06	185.87	37.174	14869.6	590.066	8851
F3C	40.32	29.61	41.19	111.12		F3C	72.82	43.23	42.65	158.7		F3C	61.69	22.14	36.45	120.28		一F3C	40.32	29.61	41.19	111.12	22.224	10667.5	352.764	5291.46		一F3C	72.82	43.23	42.65	158.7	31.74	13965.6	503.812	7557.18		一F3C	61.69	22.14	36.45	120.28	24.056	9622.4	381.843	5727.65
F3C	45.27	43.2	41.76	130.23		F3C	62.34	30.86	37.76	130.96		F3C	51.36	24.94	34.6	110.9		二F3C	45.27	43.2	41.76	130.23	26.046	12502.1	413.431	6201.46		二F3C	62.34	30.86	37.76	130.96	26.192	11524.5	415.748	6236.22		二F3C	51.36	24.94	34.6	110.9	22.18	8872	352.065	5280.98
F3C	47.83	34.23	51.4	133.46		F3C	85.2	37.01	37.97	160.18		F3C	58.26	27.59	57.5	143.35		三F3C	47.83	34.23	51.4	133.46	26.692	12812.2	423.685	6355.27		三F3C	85.2	37.01	37.97	160.18	32.036	14095.8	508.51	7627.66		三F3C	58.26	27.59	57.5	143.35	28.67	11468	455.082	6826.22
F1D	63.55	44.04	28.1	135.69		F1D	102.3	54.62	91.43	248.35		F1D	70.93	46.57	37.44	154.94		一F1D	63.55	44.04	28.1	135.69	27.138	13026.2	430.764	6461.46		一F1D	102.3	54.62	91.43	248.35	49.67	21854.8	788.417	11826.2		一F1D	70.93	46.57	37.44	154.94	30.988	12395.2	491.875	7378.13
F1D	51.88	60.85	38.76	151.49		F1D	85.35	60.66	65.24	211.25		F1D	87.7	48.3	44.65	180.65		二F1D	51.88	60.85	38.76	151.49	30.298	14543	480.923	7213.85		二F1D	85.35	60.66	65.24	211.25	42.25	18590	670.638	10059.6		二F1D	87.7	48.3	44.65	180.65	36.13	14452	573.495	8602.42
F1D	67.62	41.19	37.99	146.8		F1D	76.99	50.58	57.22	184.79		F1D	72.33	39.39	23.11	134.83		三F1D	67.62	41.19	37.99	146.8	29.36	14092.8	466.034	6990.51		三F1D	76.99	50.58	57.22	184.79	36.958	16261.5	586.638	8799.57		三F1D	72.33	39.39	23.11	134.83	26.966	10786.4	428.034	6420.51
F2D	82.38	50.02	43.05	175.45		F2D	71.92	50.34	52.27	174.53		F2D	61.9	32.75	36.42	131.07		一F2D	82.38	50.02	43.05	175.45	35.09	16843.2	556.987	8354.8		一F2D	71.92	50.34	52.27	174.53	34.906	15358.6	554.066	8310.99		一F2D	61.9	32.75	36.42	131.07	26.214	10485.6	416.097	6241.46
F2D	77.39	44.97	47.93	170.29		F2D	91.2	43.04	62.89	197.13		F2D	67.33	38.95	45.99	152.27		二F2D	77.39	44.97	47.93	170.29	34.058	16347.8	540.606	8109.09		二F2D	91.2	43.04	62.89	197.13	39.426	17347.4	625.813	9387.19		二F2D	67.33	38.95	45.99	152.27	30.454	12181.6	483.399	7250.99
F2D	56.5	37.55	38.06	132.11		F2D	96.64	48.68	60.02	205.34		F2D	80.32	35.34	38.04	153.7		三F2D	56.5	37.55	38.06	132.11	26.422	12682.6	419.399	6290.98		三F2D	96.64	48.68	60.02	205.34	41.068	18069.9	651.876	9778.14		三F2D	80.32	35.34	38.04	153.7	30.74	12296	487.939	7319.08
F3D	45.06	41.8	36.22	123.08		F3D	93.38	44.56	48.2	186.14		F3D	56.14	26.98	27.86	110.98		一F3D	45.06	41.8	36.22	123.08	24.616	11815.7	390.732	5860.98		一F3D	93.38	44.56	48.2	186.14	37.228	16380.3	590.924	8863.85		一F3D	56.14	26.98	27.86	110.98	22.196	8878.4	352.319	5284.79
F3D	60.56	32.18	32.27	125.01		F3D	70.15	37.47	61.47	169.09		F3D	66.58	25.67	41.1	133.35		二F3D	60.56	32.18	32.27	125.01	25.002	12001	396.859	5952.89		二F3D	70.15	37.47	61.47	169.09	33.818	14879.9	536.796	8051.95		二F3D	66.58	25.67	41.1	133.35	26.67	10668	423.335	6350.03
F3D	55.71	47.28	34.34	137.33		F3D	63.3	25.32	41.35	129.97		F3D	81.65	30.76	39.49	151.9		三F3D	55.71	47.28	34.34	137.33	27.466	13183.7	435.97	6539.56		三F3D	63.3	25.32	41.35	129.97	25.994	11437.4	412.605	6189.08		三F3D	81.65	30.76	39.49	151.9	30.38	12152	482.225	7233.37

## Sheet: early season maturity DM
DM at maturity in Binyang							DM at maturity in Yulin							DM at maturity in Liucheng							DM at maturity in Binyang											DM at maturity in Yulin											DM at maturity in Liucheng
	stem	spike	leaf	Leaf samples				stem	spike	leaf	Leaf samples				stem	spike	leaf	Leaf samples				stem	spike	leaf	Leaf samples	Total weight（g）	Dry weight per hill（g）	Dry weight of plot（g）	DM（kg/亩）	DM(kg/ha)			stem	spike	leaf	Leaf samples	Total weight（g）	Dry weight per hill（g）	Dry weight of plot（g）	DM（kg/亩）	DM(kg/ha)			stem	spike	leaf	Leaf samples	Total weight（g）	Dry weight per hill（g）
F1A	56.87	29.15	136.21	2.86	222.23		F1A	124.89	20.85	197.45	3.08	343.19		F1A	93.22	20.77	136.07	3.94	250.06		一F1A	56.87	29.15	136.21	2.86	222.23	44.446	21334.1	705.496	10582.4		一F1A	124.89	20.85	197.45	3.08	343.19	68.638	30200.7	1089.5	16342.5		一F1A	93.22	20.77	136.07	3.94	250.06	50.012
F1A	54.37	21.5	125.41	2.6	201.28		F1A	94.64	31.38	165.13	3.53	291.15		F1A	92.27	19.32	126.23	2.57	237.82		二F1A	54.37	21.5	125.41	2.6	201.28	40.256	19322.9	638.987	9584.81		二F1A	94.64	31.38	165.13	3.53	291.15	58.23	25621.2	924.29	13864.4		二F1A	92.27	19.32	126.23	2.57	237.82	47.564
F1A	48.87	19.39	122.61	2.91	190.87		F1A	91.69	20.88	139.93	2.71	252.5		F1A	100.77	25.45	124.07	4.36	250.29		三F1A	48.87	19.39	122.61	2.91	190.87	38.174	18323.5	605.94	9089.09		三F1A	91.69	20.88	139.93	2.71	252.5	50.5	22220	801.591	12023.9		三F1A	100.77	25.45	124.07	4.36	250.29	50.058
F2A	57.39	27.85	127.7	3.04	212.94		F2A	118.19	28.22	211.44	3.67	357.85		F2A	73.23	8.18	107.67	2.95	189.08		一F2A	57.39	27.85	127.7	3.04	212.94	42.588	20442.2	676.003	10140.1		一F2A	118.19	28.22	211.44	3.67	357.85	71.57	31490.8	1136.04	17040.6		一F2A	73.23	8.18	107.67	2.95	189.08	37.816
F2A	50.34	30.44	144.81	3.01	225.59		F2A	95.08	19.8	148.27	2.87	263.15		F2A	97.58	24.06	138.79	3.8	260.43		二F2A	50.34	30.44	144.81	3.01	225.59	45.118	21656.6	716.162	10742.4		二F2A	95.08	19.8	148.27	2.87	263.15	52.63	23157.2	835.401	12531		二F2A	97.58	24.06	138.79	3.8	260.43	52.086
F2A	46.31	15.31	111.43	2.6	173.05		F2A	57.72	15.43	132.18	3.63	205.33		F2A	86.22	18.71	112.54	3.46	217.47		三F2A	46.31	15.31	111.43	2.6	173.05	34.61	16612.8	549.368	8240.52		三F2A	57.72	15.43	132.18	3.63	205.33	41.066	18069	651.845	9777.67		三F2A	86.22	18.71	112.54	3.46	217.47	43.494
F3A	34.54	16.25	94.5	2.06	145.29		F3A	73.62	10.44	98.56	2.08	182.62		F3A	54.82	13.8	79.44	2.71	148.06		一F3A	34.54	16.25	94.5	2.06	145.29	29.058	13947.8	461.24	6918.61		一F3A	73.62	10.44	98.56	2.08	182.62	36.524	16070.6	579.749	8696.23		一F3A	54.82	13.8	79.44	2.71	148.06	29.612
F3A	46.39	21.51	111.69	2.63	179.59		F3A	52.98	18.09	112.99	2.8	184.06		F3A	59.06	13.93	84.03	2.73	157.02		二F3A	46.39	21.51	111.69	2.63	179.59	35.918	17240.6	570.13	8551.95		二F3A	52.98	18.09	112.99	2.8	184.06	36.812	16197.3	584.32	8764.81		二F3A	59.06	13.93	84.03	2.73	157.02	31.404
F3A	49.73	24.37	125.39	2.42	199.49		F3A	70.48	16.38	135.91	3.13	222.77		F3A	85.84	18.5	125.86	3.66	230.2		三F3A	49.73	24.37	125.39	2.42	199.49	39.898	19151	633.305	9499.57		三F3A	70.48	16.38	135.91	3.13	222.77	44.554	19603.8	707.21	10608.1		三F3A	85.84	18.5	125.86	3.66	230.2	46.04
F1B	54.7	22.77	210.07	4.19	287.54		F1B	75.52	30.09	216.02	5.38	321.63		F1B	87.32	36.46	201.39	4.07	325.17		一F1B	54.7	22.77	210.07	4.19	287.54	57.508	27603.8	912.83	13692.4		一F1B	75.52	30.09	216.02	5.38	321.63	64.326	28303.4	1021.05	15315.8		一F1B	87.32	36.46	201.39	4.07	325.17	65.034
F1B	49.18	22.84	202.04	5.03	274.06		F1B	72.84	20.2	178.66	5.53	271.7		F1B	103.12	23.11	204.24	5.48	330.47		二F1B	49.18	22.84	202.04	5.03	274.06	54.812	26309.8	870.036	13050.5		二F1B	72.84	20.2	178.66	5.53	271.7	54.34	23909.6	862.544	12938.2		二F1B	103.12	23.11	204.24	5.48	330.47	66.094
F1B	31.91	17.17	169.26	4.43	218.34		F1B	71.72	21.9	176.72	4.25	270.34		F1B	88.43	19.46	178.82	4.6	286.71		三F1B	31.91	17.17	169.26	4.43	218.34	43.668	20960.6	693.146	10397.2		三F1B	71.72	21.9	176.72	4.25	270.34	54.068	23789.9	858.227	12873.4		三F1B	88.43	19.46	178.82	4.6	286.71	57.342
F2B	61.76	29.25	220.74	4.19	311.75		F2B	72.52	23.41	184.84	5.15	280.77		F2B	84.62	17.86	163.86	4.43	266.34		一F2B	61.76	29.25	220.74	4.19	311.75	62.35	29928	989.687	14845.3		一F2B	72.52	23.41	184.84	5.15	280.77	56.154	24707.8	891.338	13370.1		一F2B	84.62	17.86	163.86	4.43	266.34	53.268
F2B	75.7	26.24	253.27	4.21	355.21		F2B	82.84	17.57	215.23	3.98	315.64		F2B	81.67	22.05	135.99	5.57	239.71		二F2B	75.7	26.24	253.27	4.21	355.21	71.042	34100.2	1127.66	16914.8		二F2B	82.84	17.57	215.23	3.98	315.64	63.128	27776.3	1002.04	15030.6		二F2B	81.67	22.05	135.99	5.57	239.71	47.942
F2B	33.93	18.24	159.62	4.74	211.79		F2B	72	15.2	176.65	3.73	263.85		F2B	82.66	19.48	175.33	5.52	277.47		三F2B	33.93	18.24	159.62	4.74	211.79	42.358	20331.8	672.353	10085.3		三F2B	72	15.2	176.65	3.73	263.85	52.77	23218.8	837.623	12564.3		三F2B	82.66	19.48	175.33	5.52	277.47	55.494
F3B	39.95	19.04	165.28	3.9	224.27		F3B	63.03	17.62	169.65	4.53	250.3		F3B	52.14	11.45	118.21	3.46	181.8		一F3B	39.95	19.04	165.28	3.9	224.27	44.854	21529.9	711.972	10679.6		一F3B	63.03	17.62	169.65	4.53	250.3	50.06	22026.4	794.607	11919.1		一F3B	52.14	11.45	118.21	3.46	181.8	36.36
F3B	38.83	20.47	183.68	3.75	242.98		F3B	78.38	22.78	212.23	4.42	313.39		F3B	62.47	11.15	111.82	3.2	185.44		二F3B	38.83	20.47	183.68	3.75	242.98	48.596	23326.1	771.369	11570.5		二F3B	78.38	22.78	212.23	4.42	313.39	62.678	27578.3	994.894	14923.4		二F3B	62.47	11.15	111.82	3.2	185.44	37.088
F3B	38.37	21.36	162.92	4.59	222.65		F3B	73.41	14.33	117.95	4.18	205.69		F3B	82.89	20.08	182.53	4.62	285.5		三F3B	38.37	21.36	162.92	4.59	222.65	44.53	21374.4	706.829	10602.4		三F3B	73.41	14.33	117.95	4.18	205.69	41.138	18100.7	652.987	9794.81		三F3B	82.89	20.08	182.53	4.62	285.5	57.1
F1C	81.1	29.98	180.5	4.31	291.58		F1C	115.33	26.47	171.7	4.92	313.5		F1C	112.48	51.41	161.86	5.77	325.75		一F1C	81.1	29.98	180.5	4.31	291.58	58.316	27991.7	925.655	13884.8		一F1C	115.33	26.47	171.7	4.92	313.5	62.7	27588	995.243	14928.6		一F1C	112.48	51.41	161.86	5.77	325.75	65.15
F1C	107.65	28.55	218.69	4.55	354.89		F1C	80.23	30.59	119.02	4.43	229.84		F1C	101.26	23.23	136.71	4.9	261.2		二F1C	107.65	28.55	218.69	4.55	354.89	70.978	34069.4	1126.64	16899.6		二F1C	80.23	30.59	119.02	4.43	229.84	45.968	20225.9	729.654	10944.8		二F1C	101.26	23.23	136.71	4.9	261.2	52.24
F1C	84.9	18.24	173.76	3.88	276.9		F1C	104.41	22.99	220.33	5	347.73		F1C	110.35	37.17	149.44	5.52	296.96		三F1C	84.9	18.24	173.76	3.88	276.9	55.38	26582.4	879.052	13185.8		三F1C	104.41	22.99	220.33	5	347.73	69.546	30600.2	1103.91	16558.7		三F1C	110.35	37.17	149.44	5.52	296.96	59.392
F2C	72.37	22.82	189.56	3.81	284.75		F2C	111.68	16.81	194.73	4.35	323.22		F2C	70.92	21.39	133.64	4.83	225.95		一F2C	72.37	22.82	189.56	3.81	284.75	56.95	27336	903.973	13559.6		一F2C	111.68	16.81	194.73	4.35	323.22	64.644	28443.4	1026.1	15391.5		一F2C	70.92	21.39	133.64	4.83	225.95	45.19
F2C	47.69	29.66	194.83	4.36	272.18		F2C	79.43	19.63	185.7	4.04	284.76		F2C	99.16	34.12	125.27	5.31	258.55		二F2C	47.69	29.66	194.83	4.36	272.18	54.436	26129.3	864.068	12961		二F2C	79.43	19.63	185.7	4.04	284.76	56.952	25058.9	904.005	13560.1		二F2C	99.16	34.12	125.27	5.31	258.55	51.71
F2C	81.48	22.45	173.18	4.15	277.11		F2C	89.54	39.62	227.98	5.23	357.14		F2C	83.7	26.49	173.22	5.49	283.41		三F2C	81.48	22.45	173.18	4.15	277.11	55.422	26602.6	879.719	13195.8		三F2C	89.54	39.62	227.98	5.23	357.14	71.428	31428.3	1133.78	17006.8		三F2C	83.7	26.49	173.22	5.49	283.41	56.682
F3C	45.54	17.55	132.8	2.99	195.89		F3C	78.27	25.76	137.08	4.17	241.11		F3C	52.51	9.68	82.65	2.74	144.84		一F3C	45.54	17.55	132.8	2.99	195.89	39.178	18805.4	621.876	9328.14		一F3C	78.27	25.76	137.08	4.17	241.11	48.222	21217.7	765.432	11481.5		一F3C	52.51	9.68	82.65	2.74	144.84	28.968
F3C	54.36	21.73	158.41	3.52	234.5		F3C	70.04	22.33	138.32	3.62	230.69		F3C	61.35	13.87	88.88	3.22	164.1		二F3C	54.36	21.73	158.41	3.52	234.5	46.9	22512	744.448	11166.7		二F3C	70.04	22.33	138.32	3.62	230.69	46.138	20300.7	732.353	10985.3		二F3C	61.35	13.87	88.88	3.22	164.1	32.82
F3C	76.28	23.7	174.65	3.96	274.63		F3C	85.27	22.12	196.13	3.72	303.52		F3C	71.72	16.2	123.12	3.64	211.04		三F3C	76.28	23.7	174.65	3.96	274.63	54.926	26364.5	871.846	13077.7		三F3C	85.27	22.12	196.13	3.72	303.52	60.704	26709.8	963.56	14453.4		三F3C	71.72	16.2	123.12	3.64	211.04	42.208
F1D	57.52	41.24	139.7	4.9	238.46		F1D	117.35	42.56	123.09	5.03	283		F1D	100.33	39.55	137.17	5.64	277.05		一F1D	57.52	41.24	139.7	4.9	238.46	47.692	22892.2	757.02	11355.3		一F1D	117.35	42.56	123.09	5.03	283	56.6	24904	898.417	13476.3		一F1D	100.33	39.55	137.17	5.64	277.05	55.41
F1D	51.64	37.72	119.37	5.05	208.73		F1D	96.64	35.92	111.37	3.97	243.93		F1D	110.93	27.69	94.16	4.89	232.78		二F1D	51.64	37.72	119.37	5.05	208.73	41.746	20038.1	662.638	9939.57		二F1D	96.64	35.92	111.37	3.97	243.93	48.786	21465.8	774.385	11615.8		二F1D	110.93	27.69	94.16	4.89	232.78	46.556
F1D	55.07	40.13	131.33	5.56	226.53		F1D	99.14	36.53	98.11	5.89	233.78		F1D	121.87	33.47	151.42	6.16	306.76		三F1D	55.07	40.13	131.33	5.56	226.53	45.306	21746.9	719.146	10787.2		三F1D	99.14	36.53	98.11	5.89	233.78	46.756	20572.6	742.162	11132.4		三F1D	121.87	33.47	151.42	6.16	306.76	61.352
F2D	70.44	37.91	137.6	4.78	245.95		F2D	86.37	28.92	97.35	4.14	212.64		F2D	92.81	22.08	134.47	5.09	249.36		一F2D	70.44	37.91	137.6	4.78	245.95	49.19	23611.2	780.798	11712		一F2D	86.37	28.92	97.35	4.14	212.64	42.528	18712.3	675.051	10125.8		一F2D	92.81	22.08	134.47	5.09	249.36	49.872
F2D	63.43	38.32	142.13	5.12	243.88		F2D	138.23	40.18	115.04	4.48	293.45		F2D	122.82	36.75	153.15	6.74	312.72		二F2D	63.43	38.32	142.13	5.12	243.88	48.776	23412.5	774.226	11613.4		二F2D	138.23	40.18	115.04	4.48	293.45	58.69	25823.6	931.592	13973.9		二F2D	122.82	36.75	153.15	6.74	312.72	62.544
F2D	64.12	36.47	142.13	5.51	242.72		F2D	97.54	38.04	85.93	5.46	221.51		F2D	98.11	27.33	127.02	4.84	252.46		三F2D	64.12	36.47	142.13	5.51	242.72	48.544	23301.1	770.544	11558.2		三F2D	97.54	38.04	85.93	5.46	221.51	44.302	19492.9	703.21	10548.1		三F2D	98.11	27.33	127.02	4.84	252.46	50.492
F3D	61.2	31.12	114.37	4.65	206.69		F3D	76.2	44.89	160.82	4.5	281.91		F3D	75.55	22	109.42	5	206.97		一F3D	61.2	31.12	114.37	4.65	206.69	41.338	19842.2	656.162	9842.43		一F3D	76.2	44.89	160.82	4.5	281.91	56.382	24808.1	894.957	13424.4		一F3D	75.55	22	109.42	5	206.97	41.394
F3D	57.21	31.18	107.39	4.49	195.78		F3D	89.81	21.37	99.22	3.9	210.4		F3D	70.9	13.49	72.58	4.06	156.97		二F3D	57.21	31.18	107.39	4.49	195.78	39.156	18794.9	621.527	9322.9		二F3D	89.81	21.37	99.22	3.9	210.4	42.08	18515.2	667.94	10019.1		二F3D	70.9	13.49	72.58	4.06	156.97	31.394
F3D	61.61	34.22	115.05	4.39	210.88		F3D	98.65	22.81	57.92	4	179.38		F3D	91.8	25.21	125.65	4.68	242.66		三F3D	61.61	34.22	115.05	4.39	210.88	42.176	20244.5	669.464	10042		三F3D	98.65	22.81	57.92	4	179.38	35.876	15785.4	569.463	8541.95		三F3D	91.8	25.21	125.65	4.68	242.66	48.532
[truncated: 3 more columns]

## Sheet: late season heading DM
DM of late rice at heading stage in Binyang							DM of late rice at heading stage in Yulin								DM of late rice at heading stage in Liucheng						DM of late rice at heading stage in Binyang											DM of late rice at heading stage in Yulin											DM of late rice at heading stage in Liucheng
	stem	spike	leaf	Leaf samples				stem	spike	leaf	Leaf samples				stem	spike	leaf	Leaf samples				stem	spike	leaf	Leaf samples	Total weight（g）	Dry weight per hill（g）	Dry weight of plot（g）	DM（kg/亩）	DM(kg/ha)			stem	spike	leaf	Leaf samples	Total weight（g）	Dry weight per hill（g）	Dry weight of plot（g）	DM（kg/亩）	DM(kg/ha)			stem	spike	leaf	Leaf samples	Total weight（g）	Dry weight per hill（g）
一F1A	144.17	33.71	43.14	3.54	221.02		一F1A	73.23	29.07	27.88	2.85	130.18		一F1A	114.51	46.32	44.91	3.84	205.74		一F1A	144.17	33.71	43.14	3.54	221.02	44.204	21217.9	701.654	10524.8		一F1A	73.23	29.07	27.88	2.85	130.18	26.036	11455.8	413.272	6199.08		一F1A	114.51	46.32	44.91	3.84	205.74	41.148
二F1A	113.86	35.94	47.98	2.44	197.78		二F1A	83.76	30.57	37.23	3.08	151.56		二F1A	97.3	26.71	49.48	4.25	173.49		二F1A	113.86	35.94	47.98	2.44	197.78	39.556	18986.9	627.876	9418.14		二F1A	83.76	30.57	37.23	3.08	151.56	30.312	13337.3	481.145	7217.18		二F1A	97.3	26.71	49.48	4.25	173.49	34.698
三F1A	112.77	33.14	45.54	2.83	191.45		三F1A	131.26	39.81	53.91	4.07	224.98		三F1A	124.46	39.68	46.61	3.5	210.75		三F1A	112.77	33.14	45.54	2.83	191.45	38.29	18379.2	607.781	9116.71		三F1A	131.26	39.81	53.91	4.07	224.98	44.996	19798.2	714.226	10713.4		三F1A	124.46	39.68	46.61	3.5	210.75	42.15
一F2A	83.74	22.13	27.34	2.66	133.21		一F2A	85.37	33.31	43.66	4.05	162.34		一F2A	77.46	20.79	26.67	3.27	124.92		一F2A	83.74	22.13	27.34	2.66	133.21	26.642	12788.2	422.891	6343.37		一F2A	85.37	33.31	43.66	4.05	162.34	32.468	14285.9	515.368	7730.51		一F2A	77.46	20.79	26.67	3.27	124.92	24.984
二F2A	129.85	38.23	45.87	2.78	213.95		二F2A	96.22	26.03	39.69	3.43	161.94		二F2A	115.69	39.76	50.2	4.42	205.65		二F2A	129.85	38.23	45.87	2.78	213.95	42.79	20539.2	679.21	10188.1		二F2A	96.22	26.03	39.69	3.43	161.94	32.388	14250.7	514.098	7711.47		二F2A	115.69	39.76	50.2	4.42	205.65	41.13
三F2A	101.69	36.44	39.1	3.34	177.23		三F2A	80.77	25.77	27.86	2.85	134.4		三F2A	87.61	25.29	39.01	4.38	151.91		三F2A	101.69	36.44	39.1	3.34	177.23	35.446	17014.1	562.638	8439.57		三F2A	80.77	25.77	27.86	2.85	134.4	26.88	11827.2	426.669	6400.03		三F2A	87.61	25.29	39.01	4.38	151.91	30.382
一F3A	66.25	17.81	26.02	2.03	110.08		一F3A	66.69	19.35	27.47	2.79	113.51		一F3A	109.01	27.9	39.62	3.97	176.53		一F3A	66.25	17.81	26.02	2.03	110.08	22.016	10567.7	349.462	5241.93		一F3A	66.69	19.35	27.47	2.79	113.51	22.702	9988.88	360.351	5405.27		一F3A	109.01	27.9	39.62	3.97	176.53	35.306
二F3A	49.13	13.99	16.41	2.2	79.53		二F3A	56.78	20.69	25.13	3.17	102.6		二F3A	93.19	26.64	32.54	3.27	152.37		二F3A	49.13	13.99	16.41	2.2	79.53	15.906	7634.88	252.477	3787.16		二F3A	56.78	20.69	25.13	3.17	102.6	20.52	9028.8	325.716	4885.74		二F3A	93.19	26.64	32.54	3.27	152.37	30.474
三F3A	95.73	25.4	35.64	2.73	156.77		三F3A	63.16	18.78	21.32	2.81	103.26		三F3A	88.08	27.96	32.26	3.58	148.3		三F3A	95.73	25.4	35.64	2.73	156.77	31.354	15049.9	497.685	7465.28		三F3A	63.16	18.78	21.32	2.81	103.26	20.652	9086.88	327.811	4917.17		三F3A	88.08	27.96	32.26	3.58	148.3	29.66
一F1B	90.6	29.39	42.3	4.74	162.29		一F1B	79.67	32.25	37	4.28	148.92		一F1B	110.25	46.94	47.66	6	204.85		一F1B	90.6	29.39	42.3	4.74	162.29	32.458	15579.8	515.209	7728.13		一F1B	79.67	32.25	37	4.28	148.92	29.784	13105	472.764	7091.46		一F1B	110.25	46.94	47.66	6	204.85	40.97
二F1B	106.53	28.03	38.24	5.05	172.8		二F1B	75.94	52.98	43.53	5.27	172.45		二F1B	122.78	48.47	44.76	6.12	216.01		二F1B	106.53	28.03	38.24	5.05	172.8	34.56	16588.8	548.574	8228.61		二F1B	75.94	52.98	43.53	5.27	172.45	34.49	15175.6	547.463	8211.95		二F1B	122.78	48.47	44.76	6.12	216.01	43.202
三F1B	134.76	44.51	48.65	5.07	227.92		三F1B	101.51	37.95	37.73	4.54	177.19		三F1B	100.33	47.6	41.88	4.78	189.81		三F1B	134.76	44.51	48.65	5.07	227.92	45.584	21880.3	723.559	10853.4		三F1B	101.51	37.95	37.73	4.54	177.19	35.438	15592.7	562.511	8437.66		三F1B	100.33	47.6	41.88	4.78	189.81	37.962
一F2B	118.61	36.5	47.05	4.58	202.16		一F2B	75.37	30.04	28.98	3.6	134.39		一F2B	111.19	53.92	51.48	7.22	216.59		一F2B	118.61	36.5	47.05	4.58	202.16	40.432	19407.4	641.781	9626.71		一F2B	75.37	30.04	28.98	3.6	134.39	26.878	11826.3	426.637	6399.56		一F2B	111.19	53.92	51.48	7.22	216.59	43.318
二F2B	84.61	38.56	32.34	4	155.51		二F2B	107.25	29.92	35.68	4.05	172.85		二F2B	109.22	46.1	43.4	5.6	198.72		二F2B	84.61	38.56	32.34	4	155.51	31.102	14929	493.685	7405.28		二F2B	107.25	29.92	35.68	4.05	172.85	34.57	15210.8	548.733	8230.99		二F2B	109.22	46.1	43.4	5.6	198.72	39.744
三F2B	133.02	35.25	45.33	4.63	213.6		三F2B	90.34	37.84	32.53	4.28	160.71		三F2B	94.42	42.71	42.76	5.58	179.89		三F2B	133.02	35.25	45.33	4.63	213.6	42.72	20505.6	678.099	10171.5		三F2B	90.34	37.84	32.53	4.28	160.71	32.142	14142.5	510.193	7652.9		三F2B	94.42	42.71	42.76	5.58	179.89	35.978
一F3B	84.6	23.66	20.44	3.58	128.7		一F3B	86.4	25.06	23.63	4.04	135.09		一F3B	92.58	25.19	34.5	3.98	152.27		一F3B	84.6	23.66	20.44	3.58	128.7	25.74	12355.2	408.573	6128.6		一F3B	86.4	25.06	23.63	4.04	135.09	27.018	11887.9	428.859	6432.89		一F3B	92.58	25.19	34.5	3.98	152.27	30.454
二F3B	64.32	20.56	23.4	4.05	108.28		二F3B	79.39	27.02	28.52	4.84	134.93		二F3B	81.59	31.79	24		137.38		二F3B	64.32	20.56	23.4	4.05	108.28	21.656	10394.9	343.748	5156.22		二F3B	79.39	27.02	28.52	4.84	134.93	26.986	11873.8	428.351	6425.27		二F3B	81.59	31.79	24		137.38	27.476
三F3B	118.87	30.99	40.25	4.72	190.11		三F3B	59.01	22.29	16.4	3.79	97.7		三F3B	108.2	41.83	35.15	5.6	185.18		三F3B	118.87	30.99	40.25	4.72	190.11	38.022	18250.6	603.527	9052.9		三F3B	59.01	22.29	16.4	3.79	97.7	19.54	8597.6	310.16	4652.4		三F3B	108.2	41.83	35.15	5.6	185.18	37.036
一F1C	97.47	32.13	41.72	3.6	171.32		一F1C	90.12	30.46	31.74	4.31	152.32		一F1C	126.4	48.62	46.8	5.52	221.82		一F1C	97.47	32.13	41.72	3.6	171.32	34.264	16446.7	543.876	8158.14		一F1C	90.12	30.46	31.74	4.31	152.32	30.464	13404.2	483.558	7253.37		一F1C	126.4	48.62	46.8	5.52	221.82	44.364
二F1C	88.12	27.15	32.48	3.55	147.75		二F1C	84.67	30.68	38.62	4.55	153.97		二F1C	118.29	34.88	49.8	5.13	202.97		二F1C	88.12	27.15	32.48	3.55	147.75	29.55	14184	469.05	7035.75		二F1C	84.67	30.68	38.62	4.55	153.97	30.794	13549.4	488.796	7331.94		二F1C	118.29	34.88	49.8	5.13	202.97	40.594
三F1C	120.29	38.23	60.99	3.91	219.51		三F1C	116.24	31.39	44.4	4.92	192.03		三F1C	109.91	42.32	47.52	5.45	199.75		三F1C	120.29	38.23	60.99	3.91	219.51	43.902	21073	696.861	10452.9		三F1C	116.24	31.39	44.4	4.92	192.03	38.406	16898.6	609.622	9144.33		三F1C	109.91	42.32	47.52	5.45	199.75	39.95
一F2C	73.56	27.06	27.28	3.18	127.9		一F2C	92.29	27.93	32.71	4.72	152.93		一F2C	131.31	41.03	37.31	4.78	209.65		一F2C	73.56	27.06	27.28	3.18	127.9	25.58	12278.4	406.034	6090.51		一F2C	92.29	27.93	32.71	4.72	152.93	30.586	13457.8	485.494	7282.42		一F2C	131.31	41.03	37.31	4.78	209.65	41.93
二F2C	98.4	29.22	40.84	3.64	168.46		二F2C	86.82	29.7	33.28	4.23	149.8		二F2C	121.17	42.25	43.17	5.97	206.59		二F2C	98.4	29.22	40.84	3.64	168.46	33.692	16172.2	534.796	8021.94		二F2C	86.82	29.7	33.28	4.23	149.8	29.96	13182.4	475.558	7133.37		二F2C	121.17	42.25	43.17	5.97	206.59	41.318
三F2C	80.14	25.8	26.01	3.31	131.95		三F2C	92.3	26.95	30.76	3.55	150.01		三F2C	113.28	36.18	44.88	4.74	194.34		三F2C	80.14	25.8	26.01	3.31	131.95	26.39	12667.2	418.891	6283.36		三F2C	92.3	26.95	30.76	3.55	150.01	30.002	13200.9	476.225	7143.37		三F2C	113.28	36.18	44.88	4.74	194.34	38.868
一F3C	63.51	19.3	19.79	2.63	102.6		一F3C	67.13	26.1	31.2	4.3	124.43		一F3C	110.04	34.7	42.37	5.37	187.11		一F3C	63.51	19.3	19.79	2.63	102.6	20.52	9849.6	325.716	4885.74		一F3C	67.13	26.1	31.2	4.3	124.43	24.886	10949.8	395.018	5925.27		一F3C	110.04	34.7	42.37	5.37	187.11	37.422
二F3C	51.56	15.56	16.52	2.78	83.64		二F3C	79.16	26.01	25.63	3.9	130.8		二F3C	98.67	33.84	34.86	4.89	167.37		二F3C	51.56	15.56	16.52	2.78	83.64	16.728	8029.44	265.525	3982.88		二F3C	79.16	26.01	25.63	3.9	130.8	26.16	11510.4	415.24	6228.6		二F3C	98.67	33.84	34.86	4.89	167.37	33.474
三F3C	54.04	15.78	18.75	2.38	88.57		三F3C	86.06	25.92	27.89	3.84	139.87		三F3C	112.26	35.74	33.69	4.09	181.69		三F3C	54.04	15.78	18.75	2.38	88.57	17.714	8502.72	281.176	4217.64		三F3C	86.06	25.92	27.89	3.84	139.87	27.974	12308.6	444.034	6660.51		三F3C	112.26	35.74	33.69	4.09	181.69	36.338
一F1D	124.89	33.07	30.98	4.78	188.94		一F1D	75.8	31.86	33.11	4.59	140.77		一F1D	109.55	41.51	57.96	6.55	209.02		一F1D	124.89	33.07	30.98	4.78	188.94	37.788	18138.2	599.813	8997.19		一F1D	75.8	31.86	33.11	4.59	140.77	28.154	12387.8	446.891	6703.37		一F1D	109.55	41.51	57.96	6.55	209.02	41.804
二F1D	131.21	42.79	45.67	4.78	219.67		二F1D	92.83	30.06	35.44	5.08	158.33		二F1D	126.68	33.6	60.03	6.17	220.31		二F1D	131.21	42.79	45.67	4.78	219.67	43.934	21088.3	697.369	10460.5		二F1D	92.83	30.06	35.44	5.08	158.33	31.666	13933	502.637	7539.56		二F1D	126.68	33.6	60.03	6.17	220.31	44.062
三F1D	157.49	37.59	31.57	4.32	226.65		三F1D	90.68	30.78	28.74	3.95	150.2		三F1D	125.31	33.38	51.4	5.48	210.09		三F1D	157.49	37.59	31.57	4.32	226.65	45.33	21758.4	719.527	10792.9		三F1D	90.68	30.78	28.74	3.95	150.2	30.04	13217.6	476.828	7152.42		三F1D	125.31	33.38	51.4	5.48	210.09	42.018
一F2D	103.25	30.16	26.21	3.42	159.62		一F2D	86.42	45.22	37.7	5.65	169.34		一F2D	102.26	29.93	45.8	4.6	177.99		一F2D	103.25	30.16	26.21	3.42	159.62	31.924	15323.5	506.733	7600.99		一F2D	86.42	45.22	37.7	5.65	169.34	33.868	14901.9	537.59	8063.85		一F2D	102.26	29.93	45.8	4.6	177.99	35.598
二F2D	96.98	27.08	33.97	4.92	158.03		二F2D	76.57	30.67	27.22	4.23	134.46		二F2D	139.01	45.19	58.95	5.82	243.15		二F2D	96.98	27.08	33.97	4.92	158.03	31.606	15170.9	501.685	7525.28		二F2D	76.57	30.67	27.22	4.23	134.46	26.892	11832.5	426.859	6402.89		二F2D	139.01	45.19	58.95	5.82	243.15	48.63
三F2D	100.19	33.3	28.41	4.84	161.9		三F2D	88.21	28.41	34.12	4.68	150.74		三F2D	124.18	32.28	46.42	4.43	202.88		三F2D	100.19	33.3	28.41	4.84	161.9	32.38	15542.4	513.971	7709.56		三F2D	88.21	28.41	34.12	4.68	150.74	30.148	13265.1	478.542	7178.13		三F2D	124.18	32.28	46.42	4.43	202.88	40.576
一F3D	83.38	26.39	24.27	3.8	134.04		一F3D	63.91	24.72	23.84	4.57	112.47		一F3D	99.56	25.18	42.34	4.67	167.08		一F3D	83.38	26.39	24.27	3.8	134.04	26.808	12867.8	425.526	6382.89		一F3D	63.91	24.72	23.84	4.57	112.47	22.494	9897.36	357.049	5355.74		一F3D	99.56	25.18	42.34	4.67	167.08	33.416
二F3D	71.7	16.11	12.34	3.68	100.15		二F3D	76.5	30.68	28.1	4.85	135.28		二F3D	94.3	24.5	30.78	5.61	149.58		二F3D	71.7	16.11	12.34	3.68	100.15	20.03	9614.4	317.938	4769.07		二F3D	76.5	30.68	28.1	4.85	135.28	27.056	11904.6	429.462	6441.94		二F3D	94.3	24.5	30.78	5.61	149.58	29.916
三F3D	92.28	35.1	21.65	4.68	149.03		三F3D	69.68	22.29	19.78	4.37	111.75		三F3D	91	23.57	30.42	4.67	144.99		三F3D	92.28	35.1	21.65	4.68	149.03	29.806	14306.9	473.113	7096.7		三F3D	69.68	22.29	19.78	4.37	111.75	22.35	9834	354.764	5321.46		三F3D	91	23.57	30.42	4.67	144.99	28.998
[truncated: 3 more columns]

## Sheet: late season maturity DM
DM of late rice at maturity stage in Binyang							DM of late rice at maturity stage in Yulin							DM of late rice at maturity stage in Liucheng							DM of late rice at maturity stage in Binyang											DM of late rice at maturity stage in Yulin											DM of late rice at maturity stage in Liucheng
	stem	spike	leaf	Leaf samples				stem	spike	leaf	Leaf samples				stem	spike	leaf	Leaf samples				stem	spike	leaf	Leaf samples	Total weight（g）	Dry weight per hill（g）	Dry weight of plot（g）	DM（kg/亩）	DM(kg/ha)			stem	spike	leaf	Leaf samples	Total weight（g）	Dry weight per hill（g）	Dry weight of plot（g）	DM（kg/亩）	DM(kg/ha)			stem	spike	leaf	Leaf samples	Total weight（g）	Dry weight per hill（g）
一F1A	93.39	81.39	21.81	2.88	196.59		一F1A	96.38	135.43	28.6	2.85	260.41		一F1A	109.31	150.5	22.97	2.96	282.78		一F1A	93.39	81.39	21.81	2.88	196.59	39.318	18872.6	624.098	9361.48		一F1A	96.38	135.43	28.6	2.85	260.41	52.082	22916.1	826.703	12400.5		一F1A	109.31	150.5	22.97	2.96	282.78	56.556
二F1A	119.16	106.54	26.27	2.64	251.97		二F1A	83.54	129.7	25.76	3.2	239		二F1A	91.01	96.94	24.51	3.76	212.46		二F1A	119.16	106.54	26.27	2.64	251.97	50.394	24189.1	799.909	11998.6		二F1A	83.54	129.7	25.76	3.2	239	47.8	21032	758.734	11381		二F1A	91.01	96.94	24.51	3.76	212.46	42.492
三F1A	137.11	136.08	22.83	2.56	296.02		三F1A	76.64	152.31	28.94	3.88	257.89		三F1A	85.9	128.26	18.4	3.37	232.56		三F1A	137.11	136.08	22.83	2.56	296.02	59.204	28417.9	939.751	14096.3		三F1A	76.64	152.31	28.94	3.88	257.89	51.578	22694.3	818.703	12280.5		三F1A	85.9	128.26	18.4	3.37	232.56	46.512
一F2A	68.3	86.08	6.46	2.43	160.84		一F2A	69.76	105.07	22.42	2.62	197.25		一F2A	78.29	103.32	17.89	3.17	199.5		一F2A	68.3	86.08	6.46	2.43	160.84	32.168	15440.6	510.606	7659.09		一F2A	69.76	105.07	22.42	2.62	197.25	39.45	17358	626.194	9392.9		一F2A	78.29	103.32	17.89	3.17	199.5	39.9
二F2A	78.77	105.3	12.54		196.61		二F2A	87.69	142.22	25.04	2.82	254.95		二F2A	82.96	123.52	16.16	2.92	222.64		二F2A	78.77	105.3	12.54		196.61	39.322	18874.6	624.162	9362.43		二F2A	87.69	142.22	25.04	2.82	254.95	50.99	22435.6	809.369	12140.5		二F2A	82.96	123.52	16.16	2.92	222.64	44.528
三F2A	82.66	114.31	20.23	2.24	217.2		三F2A	69.28	115.9	22.09	3.32	207.27		三F2A	90.68	96.12	14.77	2.97	201.57		三F2A	82.66	114.31	20.23	2.24	217.2	43.44	20851.2	689.527	10342.9		三F2A	69.28	115.9	22.09	3.32	207.27	41.454	18239.8	658.003	9870.05		三F2A	90.68	96.12	14.77	2.97	201.57	40.314
一F3A	50.14	57.93	12.93	1.82	121		一F3A	59.03	92.45	17.77	2.87	169.25		一F3A	63.19	84.05	14.32	2.62	161.56		一F3A	50.14	57.93	12.93	1.82	121	24.2	11616	384.129	5761.93		一F3A	59.03	92.45	17.77	2.87	169.25	33.85	14894	537.304	8059.56		一F3A	63.19	84.05	14.32	2.62	161.56	32.312
二F3A	52.85	67.91	10.83	1.77	131.59		二F3A	60.6	108.73	21.09	2.73	190.42		二F3A	84.3	113.08	11.54	3.06	208.92		二F3A	52.85	67.91	10.83	1.77	131.59	26.318	12632.6	417.748	6266.22		二F3A	60.6	108.73	21.09	2.73	190.42	38.084	16757	604.511	9067.66		二F3A	84.3	113.08	11.54	3.06	208.92	41.784
三F3A	65.13	90.71	19.3	1.88	175.14		三F3A	62.68	101.25	22.03	2.75	185.96		三F3A	77.53	114.03	11.89	2.78	203.45		三F3A	65.13	90.71	19.3	1.88	175.14	35.028	16813.4	556.003	8340.04		三F3A	62.68	101.25	22.03	2.75	185.96	37.192	16364.5	590.352	8855.28		三F3A	77.53	114.03	11.89	2.78	203.45	40.69
一F1B	134.2	161.05	28.98	3.75	324.23		一F1B	86.85	110.93	27.33	3.94	225.11		一F1B	98.51	182.85	26.28	5.38	307.64		一F1B	134.2	161.05	28.98	3.75	324.23	64.846	31126.1	1029.31	15439.6		一F1B	86.85	110.93	27.33	3.94	225.11	45.022	19809.7	714.638	10719.6		一F1B	98.51	182.85	26.28	5.38	307.64	61.528
二F1B	80.01	91.06	25	3.28	196.07		二F1B	68.02	105.56	17.61	4.07	191.19		二F1B	104.17	125.46	18.56	4.74	248.19		二F1B	80.01	91.06	25	3.28	196.07	39.214	18822.7	622.448	9336.71		二F1B	68.02	105.56	17.61	4.07	191.19	38.238	16824.7	606.955	9104.33		二F1B	104.17	125.46	18.56	4.74	248.19	49.638
三F1B	107.26	110.6	22.69	3.93	240.55		三F1B	67.13	124.19	25.17	3.72	216.49		三F1B	76.68	146.69	13.32	4.8	236.69		三F1B	107.26	110.6	22.69	3.93	240.55	48.11	23092.8	763.655	11454.8		三F1B	67.13	124.19	25.17	3.72	216.49	43.298	19051.1	687.273	10309.1		三F1B	76.68	146.69	13.32	4.8	236.69	47.338
一F2B	120.49	136.11	25.66	3.62	282.26		一F2B	84.73	171.06	33.77	4.93	289.56		一F2B	105.35	146.6	23.96	4.15	275.91		一F2B	120.49	136.11	25.66	3.62	282.26	56.452	27097	896.068	13441		一F2B	84.73	171.06	33.77	4.93	289.56	57.912	25481.3	919.243	13788.6		一F2B	105.35	146.6	23.96	4.15	275.91	55.182
二F2B	90.67	111.95	9.28	2.83	211.9		二F2B	84.51	128.39	21.2	4.35	234.1		二F2B	78.98	146.38	22.39	6.02	247.75		二F2B	90.67	111.95	9.28	2.83	211.9	42.38	20342.4	672.702	10090.5		二F2B	84.51	128.39	21.2	4.35	234.1	46.82	20600.8	743.178	11147.7		二F2B	78.98	146.38	22.39	6.02	247.75	49.55
三F2B	85.44	100.76	9.7	3.14	195.9		三F2B	69.5	159.41	23.88	4	252.79		三F2B	88.17	127.03	15.87	5.47	231.07		三F2B	85.44	100.76	9.7	3.14	195.9	39.18	18806.4	621.908	9328.62		三F2B	69.5	159.41	23.88	4	252.79	50.558	22245.5	802.512	12037.7		三F2B	88.17	127.03	15.87	5.47	231.07	46.214
一F3B	78.13	77.87	10.67	2.99	166.67		一F3B	51.15	101.46	20.58	3.98	173.19		一F3B	72.88	114.17	15.49	3.53	202.54		一F3B	78.13	77.87	10.67	2.99	166.67	33.334	16000.3	529.114	7936.71		一F3B	51.15	101.46	20.58	3.98	173.19	34.638	15240.7	549.812	8247.18		一F3B	72.88	114.17	15.49	3.53	202.54	40.508
二F3B	43.98	78.43	14.26	2.5	136.67		二F3B	51.54	94.48	14.75	3.32	160.77		二F3B	87.11	134.43	12.7	4.04	234.24		二F3B	43.98	78.43	14.26	2.5	136.67	27.334	13120.3	433.875	6508.13		二F3B	51.54	94.48	14.75	3.32	160.77	32.154	14147.8	510.384	7655.75		二F3B	87.11	134.43	12.7	4.04	234.24	46.848
三F3B	107.19	90.51	10.67	2.67	208.37		三F3B	38.09	68.65	12.74	2.93	119.48		三F3B	88.46	142.22	13.38	4.25	244.06		三F3B	107.19	90.51	10.67	2.67	208.37	41.674	20003.5	661.495	9922.43		三F3B	38.09	68.65	12.74	2.93	119.48	23.896	10514.2	379.303	5689.55		三F3B	88.46	142.22	13.38	4.25	244.06	48.812
一F1C	84.49	111.86	13.84	3.13	210.19		一F1C	91.19	149.19	36.51	3.75	276.89		一F1C	113.05	186.88	28.59	4.3	328.52		一F1C	84.49	111.86	13.84	3.13	210.19	42.038	20178.2	667.273	10009.1		一F1C	91.19	149.19	36.51	3.75	276.89	55.378	24366.3	879.02	13185.3		一F1C	113.05	186.88	28.59	4.3	328.52	65.704
二F1C	93.85	132.54	17.97	2.87	244.36		二F1C	91.77	189.3	31.42	4.2	312.49		二F1C	91.34	123.01	21.34	4.48	235.69		二F1C	93.85	132.54	17.97	2.87	244.36	48.872	23458.6	775.75	11636.2		二F1C	91.77	189.3	31.42	4.2	312.49	62.498	27499.1	992.037	14880.6		二F1C	91.34	123.01	21.34	4.48	235.69	47.138
三F1C	123.08	111.64	32.35	3.17	267.07		三F1C	80.38	151.89	23.91	4.11	256.18		三F1C	102.17	156.35	22.35	3.97	280.87		三F1C	123.08	111.64	32.35	3.17	267.07	53.414	25638.7	847.846	12717.7		三F1C	80.38	151.89	23.91	4.11	256.18	51.236	22543.8	813.274	12199.1		三F1C	102.17	156.35	22.35	3.97	280.87	56.174
一F2C	74.62	93.78	14.15	2.64	182.55		一F2C	76.44	123.58	28.98	4.33	229		一F2C	89.4	131.49	19.15	4.04	240.04		一F2C	74.62	93.78	14.15	2.64	182.55	36.51	17524.8	579.527	8692.9		一F2C	76.44	123.58	28.98	4.33	229	45.8	20152	726.988	10904.8		一F2C	89.4	131.49	19.15	4.04	240.04	48.008
二F2C	104.73	84.62	13.67	2.75	203.02		二F2C	72.31	138.33	20.65	4.14	231.29		二F2C	101.43	154.37	20.14	4.3	275.94		二F2C	104.73	84.62	13.67	2.75	203.02	40.604	19489.9	644.511	9667.67		二F2C	72.31	138.33	20.65	4.14	231.29	46.258	20353.5	734.258	11013.9		二F2C	101.43	154.37	20.14	4.3	275.94	55.188
三F2C	75.76	93.19	12.06	2.45	181.01		三F2C	60.79	136.59	22.48	4.06	219.86		三F2C	99.57	145.1	17.53	4.27	262.2		三F2C	75.76	93.19	12.06	2.45	181.01	36.202	17377	574.638	8619.57		三F2C	60.79	136.59	22.48	4.06	219.86	43.972	19347.7	697.972	10469.6		三F2C	99.57	145.1	17.53	4.27	262.2	52.44
一F3C	45	64.74	8.21	1.97	117.95		一F3C	46.37	74.64	11.58	3.25	132.59		一F3C	89.76	148.19	18.87	4.17	256.82		一F3C	45	64.74	8.21	1.97	117.95	23.59	11323.2	374.446	5616.69		一F3C	46.37	74.64	11.58	3.25	132.59	26.518	11667.9	420.923	6313.84		一F3C	89.76	148.19	18.87	4.17	256.82	51.364
二F3C	45.86	55.83	10.52	2.06	112.21		二F3C	40.88	80.01	10.57	3.25	131.46		二F3C	86.04	123.78	14.94	3.28	224.76		二F3C	45.86	55.83	10.52	2.06	112.21	22.442	10772.2	356.224	5343.36		二F3C	40.88	80.01	10.57	3.25	131.46	26.292	11568.5	417.335	6260.03		二F3C	86.04	123.78	14.94	3.28	224.76	44.952
三F3C	60.71	55.91	7.12	1.82	123.74		三F3C	64.84	140.3	19.62	3.66	224.76		三F3C	82.82	138.43	13.28	3.53	234.53		三F3C	60.71	55.91	7.12	1.82	123.74	24.748	11879	392.827	5892.41		三F3C	64.84	140.3	19.62	3.66	224.76	44.952	19778.9	713.527	10702.9		三F3C	82.82	138.43	13.28	3.53	234.53	46.906
一F1D	103	77.96	6.11	3.66	187.07		一F1D	96.89	135.52	30.72	4.67	263.13		一F1D	100.91	139.73	29.39	6.79	270.03		一F1D	103	77.96	6.11	3.66	187.07	37.414	17958.7	593.876	8908.14		一F1D	96.89	135.52	30.72	4.67	263.13	52.626	23155.4	835.338	12530.1		一F1D	100.91	139.73	29.39	6.79	270.03	54.006
二F1D	90.19	104.81	15.33	4.52	210.33		二F1D	76.16	121.91	22.14	3.86	220.21		二F1D	102.98	96.11	25.92	4.04	225.01		二F1D	90.19	104.81	15.33	4.52	210.33	42.066	20191.7	667.718	10015.8		二F1D	76.16	121.91	22.14	3.86	220.21	44.042	19378.5	699.083	10486.2		二F1D	102.98	96.11	25.92	4.04	225.01	45.002
三F1D	108.76	98.03	10.31	3.13	217.1		三F1D	72.97	136.24	23.93	4.64	233.14		三F1D	105.93	120.77	25.76	4.57	252.46		三F1D	108.76	98.03	10.31	3.13	217.1	43.42	20841.6	689.21	10338.1		三F1D	72.97	136.24	23.93	4.64	233.14	46.628	20516.3	740.131	11102		三F1D	105.93	120.77	25.76	4.57	252.46	50.492
一F2D	104.8	74.81	7.56	3.13	187.17		一F2D	89.25	135.14	31.72	4.1	256.11		一F2D	113.49	103.51	27.01	4.24	244.01		一F2D	104.8	74.81	7.56	3.13	187.17	37.434	17968.3	594.193	8912.9		一F2D	89.25	135.14	31.72	4.1	256.11	51.222	22537.7	813.052	12195.8		一F2D	113.49	103.51	27.01	4.24	244.01	48.802
二F2D	93.37	97.07	11.5	3.74	201.94		二F2D	51.57	76.43	12.1	2.95	140.1		二F2D	82.02	94.92	12.78	4.15	189.72		二F2D	93.37	97.07	11.5	3.74	201.94	40.388	19386.2	641.083	9616.24		二F2D	51.57	76.43	12.1	2.95	140.1	28.02	12328.8	444.764	6671.46		二F2D	82.02	94.92	12.78	4.15	189.72	37.944
三F2D	88.32	85.76	22.99	4.02	197.07		三F2D	71.48	98.62	25.46	4.08	195.56		三F2D	82.71	95.3	16.82	4.49	194.83		三F2D	88.32	85.76	22.99	4.02	197.07	39.414	18918.7	625.622	9384.33		三F2D	71.48	98.62	25.46	4.08	195.56	39.112	17209.3	620.829	9312.43		三F2D	82.71	95.3	16.82	4.49	194.83	38.966
一F3D	66.64	69.4	8.73	2.97	144.77		一F3D	53.14	72.88	18.35	3.89	144.37		一F3D	72.91	86.48	15.68	3.83	175.07		一F3D	66.64	69.4	8.73	2.97	144.77	28.954	13897.9	459.59	6893.84		一F3D	53.14	72.88	18.35	3.89	144.37	28.874	12704.6	458.32	6874.8		一F3D	72.91	86.48	15.68	3.83	175.07	35.014
二F3D	66.92	66.2	10.79	3.3	143.91		二F3D	73.42	109.43	20.04	4.63	202.89		二F3D	87.15	101.81	13.09	3.92	202.05		二F3D	66.92	66.2	10.79	3.3	143.91	28.782	13815.4	456.859	6852.89		二F3D	73.42	109.43	20.04	4.63	202.89	40.578	17854.3	644.098	9661.48		二F3D	87.15	101.81	13.09	3.92	202.05	40.41
三F3D	87.74	79.27	8.47	3.08	175.48		三F3D	45.08	65.25	11.47	3.11	121.8		三F3D	70.02	95.29	13.09	4.52	178.4		三F3D	87.74	79.27	8.47	3.08	175.48	35.096	16846.1	557.082	8356.23		三F3D	45.08	65.25	11.47	3.11	121.8	24.36	10718.4	386.669	5800.03		三F3D	70.02	95.29	13.09	4.52	178.4	35.68
[truncated: 3 more columns]
