# Supplementary material for: Impact of fertilization with reducing in nitrogen and phosphorous application on growth, yield and biomass accumulation of rice (Oryza sativa L.) under a dual cropping system
Source: PeerJ. 2021 Jul 7;9:e11668. doi: 10.7717/peerj.11668 (PMC8272461; doi:10.7717/peerj.11668)
Supplement: Supplemental Information 3 [file peerj-09-11668-s003.xlsx]

## Sheet: Sheet1
	1000 grain weight 1	1000 grain weight 2	Average 1000 grain weight（g）	Number of empty particles	Saturated total weight (g)	Number of spikes sampled		Effective panicles (10000 panicles / mu)	Number of solid grains	Total grains per panicle	Seed setting rate	Theoretical yield (kg / mu)
early Binyang
一F1A	18.6175	18.3246	18.4711	2297	114.465	66		20.911	6196.99	128.697	0.729573	362.663	341.457
二F1A	18.4659	18.5323	18.4991	1956	105.725	64		20.2773	5715.16	119.862	0.745019	334.973
三F1A	18.0713	18.1344	18.1029	1975	103.125	60		19.01	5696.61	127.86	0.742557	326.734
一F2A	18.3458	18.7727	18.5592	1006	118.364	67		21.2278	6377.61	110.203	0.863752	375.016	364.099
二F2A	18.9407	19.9342	19.4374	1186	129.158	63		19.9605	6644.82	124.299	0.848547	409.216
三F2A	18.0093	18.1844	18.0968	2080	97.2328	67		21.2278	5372.91	111.238	0.720914	308.066
一F3A	18.1316	18.0491	18.0904	987	83.1658	44		13.9407	4597.25	126.915	0.823253	263.497	305.385
二F3A	18.0676	18.1869	18.1273	1394	99.887	54		17.109	5510.32	127.858	0.798098	316.475
三F3A	18.293	18.1389	18.2159	1992	106.107	64		20.2773	5824.97	122.14	0.74517	336.183
一F1B	24.9772	24.9985	24.9879	2458	183.56	57		18.0595	7345.98	172	0.749286	581.58	517.673
二F1B	23.8722	23.2707	23.5714	1935	184.399	53		16.7922	7822.99	184.113	0.801701	584.238
三F1B	25.6142	25.703	25.6586	2944	122.21	48		15.208	4762.91	160.561	0.618005	387.201
一F2B	25.5613	25.7637	25.6625	2072	202.048	56		17.7427	7873.26	177.594	0.79166	640.154	610.459
二F2B	23.9342	24.0903	24.0123	2801	236.955	57		18.0595	9868.08	222.265	0.778911	750.752
三F2B	24.4297	24.5725	24.5011	1857	139.024	46		14.5743	5674.17	163.721	0.753425	440.473
一F3B	25.8714	26.1734	26.0224	1369	147.973	43		13.6238	5686.36	164.078	0.805963	468.827	468.223
二F3B	25.504	25.5663	25.5352	1407	165.085	44		13.9407	6465	178.909	0.821265	523.044
三F3B	25.8783	26.1103	25.9943	2046	130.289	39		12.3565	5012.2	180.979	0.710124	412.798
一F1C	28.0537	28.0095	28.0316	888	169.279	59		18.6932	6038.86	117.404	0.871803	536.332	544.989
二F1C	26.2396	26.1958	26.2177	1915	195.195	65		20.5942	7445.16	144.003	0.79541	618.443
三F1C	26.5782	26.899	26.7386	1783	151.56	54		17.109	5668.22	137.986	0.76071	480.193
一F2C	26.3915	26.2432	26.3174	812	180.228	58		18.3763	6848.27	132.074	0.893999	571.024	534.256
二F2C	27.3574	27.276	27.3167	2693	164.575	42		13.307	6024.72	207.565	0.691089	521.43
三F2C	25.9947	25.6349	25.8148	995	161.067	59		18.6932	6239.32	122.616	0.862461	510.314
一F3C	27.1072	27.108	27.1076	1646	119.613	46		14.5743	4412.53	131.707	0.728317	378.974	441.522
二F3C	26.632	27.0552	26.8436	716	148.721	54		17.109	5540.29	115.857	0.885555	471.199
三F3C	27.328	27.1906	27.2593	1914	149.73	53		16.7922	5492.79	139.751	0.741588	474.393
一F1D	23.1285	23.562	23.3453	3616	94.2245	61		19.3268	4036.13	125.445	0.527452	298.535	305.86
二F1D	22.7638	22.7801	22.772	3114	86.8737	56		17.7427	3814.94	123.731	0.550581	275.245
三F1D	21.2948	21.7233	21.509	3040	108.512	54		17.109	5044.93	149.721	0.623992	343.801
一F2D	23.6019	23.3596	23.4808	3943	100.798	56		17.7427	4292.78	147.068	0.521236	319.361	341.755
二F2D	22.1979	22.2133	22.2056	3405	116.568	57		18.0595	5249.49	151.833	0.606563	369.327
三F2D	23.1892	23.1832	23.1862	3960	106.232	56		17.7427	4581.69	152.53	0.536391	336.578
一F3D	22.6436	22.4997	22.5717	2256	95.0993	54		17.109	4213.22	119.8	0.651272	301.306	300.516
二F3D	22.5634	22.6137	22.5886	2143	90.6044	53		16.7922	4011.08	116.115	0.651776	287.065
三F3D	20.9829	20.8169	20.8999	2383	98.8458	55		17.4258	4729.49	129.318	0.664955	313.176
early Yulin
一F1A	18.0358	18.2	18.1179	2395	173.205	92		29.2065	9559.87	129.944	0.799663	549.859	477.594
二F1A	17.6957	17.4662	17.581	1598	152.739	80		25.397	8687.74	128.572	0.844639	484.887
三F1A	17.0947	17.214	17.1544	1965	125.381	90		28.5716	7308.97	103.044	0.788117	398.036
一F2A	17.5387	17.8887	17.7137	2486	187.749	84		26.6668	10599.1	155.775	0.810013	596.033	464.325
二F2A	17.5808	17.8472	17.714	2255	129.047	78		24.762	7285.03	122.308	0.763628	409.675
三F2A	17.9297	18.1345	18.0321	1368	121.989	66		20.9525	6765.09	123.229	0.831798	387.268
一F3A	17.7072	17.7716	17.7394	1469	83.9325	59		18.7303	4731.42	105.092	0.76308	266.454	326.557
二F3A	17.1478	17.4918	17.3198	1773	98.4417	59		18.7303	5683.77	126.386	0.762229	312.515
三F3A	17.4762	17.8442	17.6602	1017	126.221	63		20.0001	7147.19	129.59	0.875432	400.703
一F1B	21.511	21.8355	21.6732	1710	201.336	60		19.0477	9289.59	183.326	0.84454	639.164	541.256
二F1B	22.3927	22.2063	22.2995	3981	151.082	48		15.2382	6775.13	224.086	0.629885	479.628
三F1B	23.1791	22.6815	22.9303	2225	159.067	52		16.508	6936.97	176.192	0.757148	504.976
一F2B	22.2721	22.2487	22.2604	2936	161.914	46		14.6032	7273.65	221.949	0.712429	514.017	564.042
二F2B	24.8867	25.4132	25.15	799	205.59	54		17.1429	8174.56	166.177	0.910961	652.669
三F2B	24.1465	24.2785	24.2125	1076	165.513	46		14.6032	6835.85	171.997	0.864001	525.44
一F3B	25.2373	25.4132	25.3253	1071	148.685	34		10.7937	5871.03	204.177	0.845722	472.019	464.288
二F3B	25.7613	25.6245	25.6929	2872	177.912	50		15.8731	6924.56	195.931	0.706836	564.803
三F3B	24.3804	24.4783	24.4293	676	112.152	26		8.25401	4590.88	202.572	0.871651	356.041
一F1C	26.0127	26.4265	26.2196	2031	156.923	55		17.4604	5984.95	145.744	0.74663	498.17	492.331
二F1C	24.7896	25.1348	24.9622	2095	104.521	57		18.0953	4187.17	110.213	0.666516	331.814
三F1C	25.858	26.7328	26.2954	1734	203.807	60		19.0477	7750.66	158.078	0.817178	647.009
一F2C	26.7606	27.0421	26.9014	1453	180.507	59		18.7303	6709.95	138.355	0.822001	573.04	594.674
二F2C	25.6517	25.5539	25.6028	1303	172.044	51		16.1906	6719.73	157.308	0.837586	546.174
三F2C	25.4504	25.919	25.6847	1923	209.413	55		17.4604	8153.24	183.204	0.809155	664.808
一F3C	27.0421	27.2743	27.1582	2152	115.522	47		14.9207	4253.67	136.291	0.664047	366.738	430.231
二F3C	27.3872	27.1449	27.266	1741	123.035	47		14.9207	4512.38	133.051	0.721591	390.589
三F3C	26.431	26.4059	26.4184	2233	168.009	53		16.8255	6359.55	162.124	0.740124	533.366
一F1D	21.2367	21.6622	21.4494	3486	100.799	67		21.2699	4699.36	122.169	0.574117	319.997	276.601
二F1D	20.7716	21.2178	20.9947	3888	88.2871	69		21.9049	4205.21	117.293	0.519597	280.278
三F1D	24.4605	24.7068	24.5836	2775	72.3013	56		17.7779	2941.03	102.072	0.514523	229.529
一F2D	20.7322	20.4269	20.5796	2620	81.3832	59		18.7303	3954.57	111.433	0.601495	258.361	216.791
二F2D	23.0123	23.2966	23.1545	5044	66.7678	60		19.0477	2883.58	132.126	0.363741	211.962
三F2D	20.728	20.6027	20.6654	4096	56.7156	59		18.7303	2744.48	115.94	0.401211	180.05
一F3D	21.9858	22.1755	22.0806	4011	128.355	72		22.8573	5813.01	136.445	0.591715	407.478	252.625
二F3D	21.5417	21.3952	21.4685	2560	81.0589	55		17.4604	3775.72	115.195	0.595942	257.331
三F3D	21.7079	21.7075	21.7077	3174	29.3153	48		15.2382	1350.46	94.2595	0.298479	93.0649
early Liucheng
一F1A	17.1009	17.4871	17.294	1409	126.651	63		20.0001	7323.4	138.61	0.838647	402.068	354.437
二F1A	16.9408	17.0701	17.0054	2424	106.049	63		20.0001	6236.16	137.463	0.720098	336.664
三F1A	17.5745	18.1734	17.874	2604	102.242	59		18.7303	5720.17	141.088	0.687176	324.58
一F2A	17.1359	17.8602	17.498	1526	95.4796	54		17.1429	5456.59	129.307	0.781456	303.111	332.557
二F2A	16.8279	16.9837	16.9058	2053	123.975	57		18.0953	7333.28	164.672	0.781277	393.573
三F2A	16.716	17.2014	16.9587	2225	94.8104	59		18.7303	5590.66	132.469	0.715315	300.987
一F3A	16.1947	16.4183	16.3065	675	74.3678	38		12.0636	4560.62	137.78	0.871076	236.089	279.995
二F3A	16.8758	17.0368	16.9563	1294	73.7132	43		13.6509	4347.25	131.192	0.770618	234.011
三F3A	17.6363	18.1294	17.8829	1331	116.513	51		16.1906	6515.33	153.85	0.830367	369.883
一F1B	22.5846	23.2715	22.928	1742	190.852	58		18.4128	8323.95	173.551	0.826941	605.882	581.631
二F1B	22.4786	22.8715	22.675	1982	191.862	40		12.6985	8461.35	261.084	0.810214	609.087
三F1B	23.4199	22.9405	23.1802	2179	166.925	44		13.9683	7201.18	213.186	0.767702	529.923
一F2B	23.381	22.9792	23.1801	1093	157.122	38		12.0636	6778.31	207.14	0.861141	498.802	475.387
二F2B	23.0673	23.0193	23.0433	1465	126.307	32		10.1588	5481.29	217.071	0.789096	400.976
三F2B	22.2652	23.1979	22.7315	1579	165.81	34		10.7937	7294.25	260.978	0.822049	526.383
一F3B	23.604	23.9067	23.7553	843	111.706	35		11.1112	4702.35	158.439	0.847981	354.624	406.252
二F3B	23.4183	23.4117	23.415	1307	102.692	32		10.1588	4385.76	177.899	0.77041	326.01
三F3B	23.117	23.4093	23.2631	1511	169.507	45		14.2858	7286.52	195.5	0.828247	538.121
一F1C	25.3104	25.3403	25.3254	4129	127.715	52		16.508	5042.97	176.384	0.549824	405.446	397.561
二F1C	25.6968	25.5959	25.6464	2053	119.867	46		14.6032	4673.83	146.235	0.694804	380.531
三F1C	24.7771	25.0316	24.9044	2635	128.112	46		14.6032	5144.16	169.112	0.661274	406.706
一F2C	25.908	26.418	26.163	2472	105.495	42		13.3334	4032.22	154.862	0.619939	334.906	389.385
二F2C	25.7912	25.6459	25.7186	2878	105.379	45		14.2858	4097.4	155.009	0.587407	334.539
三F2C	24.8624	24.8518	24.8571	1745	157.092	47		14.9207	6319.82	171.592	0.783628	498.709
一F3C	24.6626	24.4871	24.5749	1292	71.5955	37		11.7461	2913.36	113.659	0.692773	227.288	277.07
二F3C	23.9556	23.2241	23.5898	1123	79.5404	36		11.4286	3371.81	124.856	0.750156	252.51
三F3C	25.2274	25.371	25.2992	1351	110.694	36		11.4286	4375.38	159.066	0.764074	351.41
一F1D	21.3507	21.8489	21.5998	2878	117.957	53		16.8255	5461.01	157.34	0.654875	374.468	348.317
二F1D	21.4896	21.6869	21.5882	2160	79.2041	48		15.2382	3668.85	121.434	0.62943	251.443
三F1D	20.0596	20.2672	20.1634	2826	131.997	51		16.1906	6546.38	183.772	0.698476	419.041
一F2D	20.9158	21.0235	20.9697	2710	115.274	43		13.6509	5497.17	190.864	0.669801	365.95	385.037
二F2D	20.5376	20.1219	20.3298	3087	136.37	48		15.2382	6707.89	204.06	0.684836	432.922
三F2D	21.217	21.5505	21.3837	2011	112.214	43		13.6509	5247.64	168.806	0.722951	356.237
一F3D	20.018	20.5823	20.3001	1912	96.1048	44		13.9683	4734.19	151.05	0.712316	305.096	279.422
二F3D	20.6009	21.134	20.8675	2240	57.7288	39		12.381	2766.45	128.371	0.552577	183.267
三F3D	20.9479	21.295	21.1214	2045	110.219	44		13.9683	5218.35	165.076	0.718449	349.904
late Binyang
一F1A	18.6296	18.6543	18.642	4116	59.42	65		20.5942	3187.43	112.361	0.43643	188.262	239.269
二F1A	17.5025	17.5807	17.5416	6759	64.8919	80		25.3467	3699.31	130.729	0.35372	205.599
三F1A	18.6778	18.6883	18.6831	5810	102.245	81		25.6635	5472.61	139.291	0.485048	323.946
一F2A	19.654	19.6408	19.6474	2759	69.4703	46		14.5743	3535.85	136.845	0.561705	220.105	262.561
二F2A	19.9484	19.9359	19.9422	3631	83.7052	62		19.6437	4197.4	126.265	0.536176	265.206
三F2A	18.229	18.9206	18.5748	3439	95.4359	60		19.01	5137.92	142.949	0.59904	302.373
一F3A	18.0074	18.2617	18.1346	2039	45.7542	43		13.6238	2523.04	106.094	0.553051	144.965	184.547
二F3A	18.4904	18.537	18.5137	2018	55.2382	45		14.2575	2983.64	111.148	0.596532	175.013
三F3A	17.9406	18.0612	18.0009	2542	73.7497	62		19.6437	4097	107.081	0.617111	233.664
一F1B	25.0061	25.0451	25.0256	4081	135.761	54		17.109	5424.88	176.035	0.570687	430.135	314.561
二F1B	25.6877	25.3427	25.5152	3317	68.5523	36		11.406	2686.72	166.77	0.44751	217.196
三F1B	25.4641	25.6094	25.5368	2465	93.535	37		11.7228	3662.76	165.615	0.597732	296.35
一F2B	25.1582	24.9115	25.0348	3717	112.137	51		16.1585	4479.25	160.711	0.5465	355.288	310.371
二F2B	25.9708	25.9641	25.9674	2766	94.1533	42		13.307	3625.82	152.186	0.567259	298.309
三F2B	25.4714	25.1054	25.2884	2480	87.5901	35		11.0892	3463.65	169.818	0.582748	277.515
一F3B	24.995	25.2267	25.1108	2244	63.4865	36		11.406	2528.25	132.562	0.529782	201.146	203.589
二F3B	25.5547	25.7436	25.6491	2056	64.7651	30		9.505	2525.04	152.701	0.551194	205.197
三F3B	24.805	24.6953	24.7502	2959	64.5208	46		14.5743	2606.89	120.998	0.468368	204.423
一F1C	27.2968	27.5504	27.4236	2497	92.5738	43		13.6238	3375.7	136.574	0.574812	293.305	284.577
二F1C	26.7717	27.0132	26.8925	4183	96.7768	53		16.7922	3598.66	146.824	0.462454	306.621
三F1C	23.6492	23.7733	23.7112	4711	80.1065	54		17.109	3378.42	149.804	0.417634	253.804
一F2C	25.4399	25.6818	25.5608	2822	74.4211	47		14.8912	2911.53	121.99	0.507807	235.791	231.639
二F2C	26.1276	25.9123	26.02	2402	68.7887	42		13.307	2643.69	120.135	0.52395	217.945
三F2C	25.3564	25.3495	25.3529	2825	76.1221	48		15.208	3002.49	121.406	0.515229	241.18
一F3C	25.8326	25.803	25.8178	1205	55.3245	35		11.0892	2142.88	95.6538	0.640071	175.286	150.77
二F3C	24.8826	24.942	24.9123	1738	43.2591	36		11.406	1736.46	96.5127	0.499778	137.059
三F3C	24.9822	24.7624	24.8723	1543	44.176	36		11.406	1776.11	92.1976	0.535117	139.964
一F1D	22.1584	22.3619	22.2601	3920	57.7776	36		11.406	2595.56	180.988	0.398363	183.059	230.638
二F1D	22.6196	22.4432	22.5314	3314	85.5761	37		11.7228	3798.08	192.218	0.534032	271.134
三F1D	23.8346	23.6151	23.7248	4157	75.0307	44		13.9407	3162.54	166.353	0.432068	237.722
一F2D	21.6229	21.5857	21.6043	3961	52.2366	45		14.2575	2417.88	141.753	0.379045	165.503	197.553
二F2D	23.9965	24.3112	24.1538	3873	75.5582	41		12.9902	3128.21	170.761	0.44681	239.394
三F2D	21.8594	21.8387	21.849	4358	59.262	40		12.6733	2712.34	176.758	0.383622	187.762
一F3D	21.365	21.0775	21.2213	2196	56.4323	28		8.87133	2659.24	173.401	0.547705	178.796	166.275
二F3D	22.4198	22.2668	22.3433	2963	48.3542	29		9.18816	2164.15	176.798	0.422096	153.202
三F3D	22.5915	22.7663	22.6789	3561	52.6547	37		11.7228	2321.75	158.993	0.394671	166.828
late Yulin
一F1A	18.6259	18.8081	18.717	2992	107.438	69		21.9049	5740.15	126.553	0.657358	341.076	341.818
二F1A	19.1146	18.9798	19.0472	2951	101.021	59		18.7303	5303.71	139.91	0.642507	320.703
三F1A	18.5899	18.7282	18.6591	2907	114.557	56		17.7779	6139.5	161.545	0.67866	363.676
一F2A	18.0989	18.0609	18.0799	2136	87.8323	59		18.7303	4858.01	118.543	0.694596	278.834	319.627
二F2A	18.3146	18.3733	18.3439	2272	117.918	73		23.1747	6428.18	119.181	0.738856	374.346
三F2A	18.3569	18.1586	18.2578	2314	96.2955	52		16.508	5274.23	145.927	0.695054	305.702
一F3A	17.339	17.5276	17.4333	2072	74.6226	51		16.1906	4280.46	124.558	0.673827	236.898	265.039
二F3A	17.4576	17.535	17.4963	1732	90.8978	54		17.1429	5195.26	128.283	0.749973	288.566
三F3A	17.7133	17.4345	17.5739	1926	84.94	60		19.0477	4833.3	112.655	0.715059	269.652
一F1B	26.5775	26.6226	26.6	3018	88.2671	38		12.0636	3318.31	166.745	0.523697	280.214	302.585
二F1B	26.2173	25.9145	26.0659	2275	89.5247	37		11.7461	3434.55	154.312	0.601545	284.207
三F1B	26.56	26.6421	26.6011	2111	108.15	36		11.4286	4065.61	171.573	0.658227	343.333
一F2B	26.2517	26.1243	26.188	3288	145.885	38		12.0636	5570.67	233.123	0.628838	463.128	417.781
二F2B	26.6169	26.3705	26.4937	2213	109.266	37		11.7461	4124.24	171.277	0.650795	346.88
三F2B	26.5538	26.4868	26.5203	2122	139.65	38		12.0636	5265.78	194.415	0.712769	443.336
一F3B	23.8565	23.8633	23.8599	1398	92.7471	30		9.52386	3887.15	176.172	0.735485	294.437	243.959
二F3B	25.4316	25.4897	25.4607	1807	80.0041	32		10.1588	3142.26	154.665	0.634895	253.983
三F3B	25.2271	25.2588	25.243	1451	57.7885	29		9.2064	2289.29	128.976	0.612062	183.456
一F1C	26.6837	27.0886	26.8862	3677	115.269	54		17.1429	4287.28	147.487	0.538314	365.934	429.387
二F1C	26.6376	26.3225	26.48	2896	159.597	50		15.8731	6027.07	178.461	0.675448	506.66
三F1C	27.5718	27.6405	27.6061	243	130.903	40		12.6985	4741.79	124.62	0.951252	415.566
一F2C	25.555	24.9806	25.2678	2088	107.287	46		14.6032	4245.99	137.695	0.67035	340.595	367.636
二F2C	27.1026	27.0792	27.0909	1966	118.406	42		13.3334	4370.69	150.874	0.689743	375.894
三F2C	25.9655	25.3524	25.659	1345	121.721	41		13.0159	4743.81	148.508	0.779103	386.419
一F3C	27.5837	27.0967	27.3402	1284	62.235	26		8.25401	2276.32	136.935	0.639358	197.572	263.699
二F3C	26.3263	26.3697	26.348	1010	67.9786	29		9.2064	2580.03	123.794	0.718665	215.806
三F3C	26.8541	26.4401	26.6471	1934	118.981	43		13.6509	4465.05	148.815	0.697768	377.718
一F1D	24.0818	24.0876	24.0847	3914	96.667	43		13.6509	4013.63	184.363	0.506284	306.881	322.409
二F1D	23.8287	23.405	23.6168	2837	95.8378	39		12.381	4058.03	176.796	0.588544	304.249
三F1D	22.8304	22.2572	22.5438	2963	112.17	39		12.381	4975.64	203.555	0.626762	356.097
一F2D	22.7261	22.5056	22.6158	3888	103.637	48		15.2382	4582.49	176.469	0.540995	329.008	261.934
二F2D	23.5965	24.2733	23.9349	1654	59.4655	28		8.88893	2484.47	147.802	0.600335	188.78
三F2D	21.2866	20.7029	20.9947	1928	84.4237	43		13.6509	4021.18	138.353	0.675922	268.013
一F3D	22.1125	21.9625	22.0375	1971	53.3592	28		8.88893	2421.29	156.868	0.551259	169.395	202.667
二F3D	22.4099	22.5572	22.4836	3005	85.3467	36		11.4286	3795.96	188.916	0.558151	270.943
三F3D	23.7288	23.5838	23.6563	1300	52.8135	25		7.93655	2232.53	141.301	0.631992	167.663
late Liucheng
一F1A	18.96	19.154	19.057	6054	116.949	79		25.0795	6136.8	154.314	0.503396	371.269	301.607
二F1A	18.5815	18.3105	18.446	3638	74.1891	55		17.4604	4021.96	139.272	0.525063	235.522
三F1A	19.1773	19.3034	19.2403	4354	93.879	62		19.6826	4879.28	148.924	0.528445	298.03
一F2A	18.8343	19.0426	18.9384	3928	78.2744	57		18.0953	4133.09	141.423	0.512721	248.491	262.13
二F2A	18.5188	18.5921	18.5555	4234	96.0484	62		19.6826	5176.29	151.779	0.550067	304.917
三F2A	18.3291	18.5797	18.4544	4330	73.3888	64		20.3176	3976.76	129.793	0.478738	232.981
一F3A	19.6305	19.7004	19.6654	2771	63.9978	47		14.9207	3254.33	128.198	0.540108	203.169	253.093
二F3A	19.995	19.939	19.967	3963	85.8778	56		17.7779	4300.99	147.571	0.520449	272.629
三F3A	18.4486	18.4296	18.4391	3345	89.2957	60		19.0477	4842.74	136.462	0.591462	283.48
一F1B	24.1506	24.2083	24.1794	6698	141.579	49		15.5556	5855.34	256.191	0.466437	449.459	389.89
二F1B	23.4265	23.8156	23.6211	3614	100.292	33		10.4762	4245.87	238.178	0.540196	318.389
三F1B	24.3754	23.1683	23.7719	3374	126.573	37		11.7461	5324.48	235.094	0.612116	401.82
一F2B	24.7574	24.5699	24.6637	4872	112.797	44		13.9683	4573.4	214.668	0.484194	358.087	352.206
二F2B	23.9604	24.5929	24.2767	3925	114.466	36		11.4286	4715.08	240.002	0.545722	363.387
三F2B	24.7159	24.6929	24.7044	2848	105.57	33		10.4762	4273.33	215.798	0.600075	335.145
一F3B	24.6346	24.6164	24.6255	2423	98.691	35		11.1112	4007.67	183.734	0.623212	313.306	353.482
二F3B	24.4953	24.3594	24.4274	3020	113.71	42		13.3334	4655.04	182.739	0.606517	360.987
三F3B	22.9146	22.3028	22.6087	2934	121.637	42		13.3334	5380.11	197.955	0.647106	386.152
一F1C	27.7817	27.5199	27.6508	3871	154.953	59		18.7303	5603.92	160.592	0.591448	491.916	404.763
二F1C	24.669	24.4428	24.5559	2893	101.127	48		15.2382	4118.24	146.067	0.587377	321.04
三F1C	27.0839	26.9483	27.0161	3333	126.419	54		17.1429	4679.39	148.378	0.584019	401.332
一F2C	28.2554	28.2769	28.2661	3531	100.874	43		13.6509	3568.71	165.11	0.502656	320.236	357.205
二F2C	27.7222	27.2739	27.498	3959	124.527	55		17.4604	4528.59	154.32	0.533554	395.327
三F2C	27.7074	27.8104	27.7589	3767	112.156	53		16.8255	4040.37	147.309	0.517507	356.053
一F3C	26.4353	26.2438	26.3395	3141	125.59	49		15.5556	4768.12	161.411	0.602863	398.701	368.364
二F3C	26.8327	26.7568	26.7948	2780	105.193	53		16.8255	3925.89	126.526	0.585439	333.949
三F3C	27.1234	27.3938	27.2586	2752	117.319	53		16.8255	4303.92	133.13	0.609973	372.442
一F1D	20.1015	20.36	20.2308	4872	112.195	42		13.3334	5545.75	248.042	0.532337	356.175	253.923
二F1D	20.5808	20.6122	20.5965	4231	59.8459	51		16.1906	2905.63	139.934	0.407144	189.988
三F1D	23.2425	23.0789	23.1607	4317	67.915	50		15.8731	2932.34	144.987	0.404497	215.604
一F2D	20.2502	20.0945	20.1724	3016	78.8029	54		17.1429	3906.48	128.194	0.564318	250.169	219.484
二F2D	24.8334	24.7947	24.8141	3812	59.3341	40		12.6985	2391.15	155.079	0.385473	188.363
三F2D	21.7332	21.6013	21.6672	2915	69.2748	43		13.6509	3197.21	142.144	0.523086	219.921
一F3D	23.1058	23.1496	23.1277	3099	54.9315	42		13.3334	2375.14	130.337	0.433884	174.387	208.009
二F3D	21.023	21.2086	21.1158	3076	69.0946	42		13.3334	3272.18	151.147	0.515451	219.349
三F3D	22.0007	21.4974	21.7491	2458	72.5417	36		11.4286	3335.4	160.928	0.575724	230.292
